# Supplementary material for: Structures of a non-ribosomal peptide synthetase condensation domain suggest the basis of substrate selectivity
Source: PubMed Central journal article supplement (PMC8097023; doi:10.1038/s41467-021-22623-0), 2021-05-04
Supplement: 41467_2021_22623_MOESM1_ESM.pdf [file 41467_2021_22623_MOESM1_ESM.pdf]

# Structures of a non-ribosomal peptide synthetase condensation domain suggest the basis of substrate selectivity

Izoré and Ho *et al.*

## Supplementary information

### Supplementary Tables

|                                                                                             |        |
|---------------------------------------------------------------------------------------------|--------|
| 1. Data collection and refinement statistics (molecular replacement)                        | Page 3 |
| 2. Similar structures to the PCP <sub>2</sub> domain (PDB ID 7KVW) as identified by DALI    | Page 4 |
| 3. Similar structures to the C <sub>3</sub> domain (PDB ID 7KVW) as identified by DALI      | Page 4 |
| 4. Interface residues in the PCP <sub>2</sub> -C <sub>3</sub> complex as identified by PISA | Page 5 |
| 5. Interactions between interface residues in the PCP <sub>2</sub> -C <sub>3</sub> complex  | Page 5 |
| 6. Primer sequences and Spyttag/Spycatcher sequences                                        | Page 6 |

### Supplementary Discussion

|                                                                        |        |
|------------------------------------------------------------------------|--------|
| Computational investigation of the mechanism of peptide bond formation | Page 8 |
|------------------------------------------------------------------------|--------|

### Supplementary Figures

|                                                                                                                                                                                                                                                 |         |
|-------------------------------------------------------------------------------------------------------------------------------------------------------------------------------------------------------------------------------------------------|---------|
| 1. Structural alignment (superposition) of the fuscachelin synthetase C <sub>3</sub> domain with C domains from surfactin and linear gramicidin                                                                                                 | Page 9  |
| 2. Superposition of PCP-C <sub>3</sub> structures that displays the PCP-orientation relative to the C domain                                                                                                                                    | Page 9  |
| 3. Superposition of the fuscachelin PCP <sub>2</sub> -C <sub>3</sub> didomain with C domains containing a PPant-modified PCP-domain (AB3403 and ObiF1)                                                                                          | Page 10 |
| 4. Computational rigid body protein-protein docking of PCP <sub>3</sub> onto the acceptor PCP binding site of the C <sub>3</sub> domain                                                                                                         | Page 11 |
| 5. Tunnel analysis combined with molecular dynamics (MD) simulations highlight the intrinsic dynamics of the acceptor substrate tunnel                                                                                                          | Page 12 |
| 6. Sequence Logos of the R2577 residue of the PCP <sub>2</sub> -C <sub>3</sub> didomain for C domains with <sup>1</sup> C <sub>L</sub> selectivity, <sup>2</sup> C <sub>L</sub> selectivity and starter C domains taken from the MiBiG database | Page 13 |
| 7. Crystal structure of the R2577 mutant of the PCP <sub>2</sub> -C <sub>3</sub> protein                                                                                                                                                        | Page 14 |
| 8. Polder maps showing the electron density for the expected PCP-substrates                                                                                                                                                                     | Page 14 |
| 9. Chemical structures of Gly-CoA (aminoacyl-CoA) and the stabilized Gly <sub>stab</sub> -CoA (modified Gly-CoA)                                                                                                                                | Page 15 |
| 10. Interactions of R2577 with the PPant arm in the Gly <sub>stab</sub> structure                                                                                                                                                               | Page 15 |
| 11. Sequence Logos of the PPant interacting residues of the PCP <sub>2</sub> -C <sub>3</sub> didomain for C domains with <sup>1</sup> C <sub>L</sub> selectivity and <sup>2</sup> C <sub>L</sub> selectivity taken from the MiBiG database      | Page 16 |
| 12. Comparison of the structures of a C domain containing a crosslinked acceptor mimic (PDB ID 5DU9) the Gly <sub>stab</sub> structure (PDB ID 7KW0)                                                                                            | Page 17 |
| 13. PPant ejection results showing extension of Gly <sub>stab</sub>                                                                                                                                                                             | Page 18 |
| 14. Top poses of alternate acceptor substrates computationally docked into the C <sub>3</sub> domain                                                                                                                                            | Page 19 |
| 15. C domains do not appear have an “A domain like” side chain selection pocket for                                                                                                                                                             |         |

|                                                                                                                   |         |
|-------------------------------------------------------------------------------------------------------------------|---------|
| their acceptor substrates                                                                                         | Page 20 |
| 16. Stacked bar plots of substrate size percentage by mutation in the HHxxxDX motif                               | Page 21 |
| 17. Glycine-PPant and Gly <sub>stab</sub> -PPant computationally docked into WT and E2702G C <sub>3</sub> domains | Page 22 |
| 18. Synthesis and characterization of BA-D-Arg-Gly-CoA                                                            | Page 22 |
| 19. Synthesis and characterization of DHB-D-Arg-Gly-CoA                                                           | Page 23 |
| 20. Synthesis and characterization of Gly <sub>stab</sub> -CoA                                                    | Page 23 |
| 21. Synthesis and characterization of d <sub>4</sub> -Gly <sub>stab</sub> -CoA                                    | Page 23 |
| 22. Synthesis and characterization of Gly-CoA                                                                     | Page 23 |
| 23. Synthesis and characterization of Ala-CoA                                                                     | Page 23 |
| 24. <sup>1</sup> H NMR spectrum of BA-D-Arg-Gly CoA                                                               | Page 25 |
| 25. <sup>1</sup> H NMR spectrum of DHB-D-Arg-Gly CoA                                                              | Page 26 |
| 26. <sup>1</sup> H NMR spectrum of Gly <sub>stab</sub> -CoA                                                       | Page 27 |
| 27. <sup>1</sup> H NMR spectrum of d <sub>4</sub> -Gly <sub>stab</sub> -CoA                                       | Page 28 |
| 28. <sup>1</sup> H NMR spectrum of Gly-CoA                                                                        | Page 29 |
| 29. <sup>1</sup> H NMR spectrum of Ala-CoA                                                                        | Page 30 |
| 30. LC-HRMS analyses for reconstitution of PCP2-C3::PCP3 WT without SpyCatcher and SpyTag                         | Page 31 |
| 31. LC-HRMS analyses for reconstitution of PCP2-C3::PCP3 WT using SpyCatcher and SpyTag                           | Page 32 |
| 32. LC-HRMS analyses for reconstitution of PCP2-C3::PCP3 WT using SpyCatcher and SpyTag                           | Page 33 |
| 33. LC-HRMS analyses for reconstitution of PCP2-C3::PCP3 WT using SpyCatcher and SpyTag                           | Page 35 |
| 34. LC-HRMS analyses for reconstitution of PCP2-C3::PCP3 WT using SpyCatcher and SpyTag                           | Page 36 |
| 35. LC-HRMS analyses for reconstitution of PCP2-C3::PCP3 WT using SpyCatcher and SpyTag                           | Page 37 |
| <b>Supplementary References</b>                                                                                   | Page 38 |

## Supplementary Tables

**Supplementary Table 1. Data collection and refinement statistics (molecular replacement)**

|                                                     | <b>WT PCP<sub>2</sub>-C<sub>3</sub><br/>PPant<br/>(PDB 7KVW)</b> | <b>WT PCP<sub>2</sub>-C<sub>3</sub><br/>Gly<sub>stab</sub><br/>(PDB 7KW0)</b> | <b>R2577G PCP<sub>2</sub>-C<sub>3</sub><br/>PPant<br/>(PDB 7KW2)</b> | <b>PCP<sub>3</sub><br/>(PDB 7KW3)</b> |
|-----------------------------------------------------|------------------------------------------------------------------|-------------------------------------------------------------------------------|----------------------------------------------------------------------|---------------------------------------|
| <b>Data collection</b>                              |                                                                  |                                                                               |                                                                      |                                       |
| Space group                                         | <i>P</i> 2 <sub>1</sub> 2 <sub>1</sub> 2 <sub>1</sub>            | <i>P</i> 2 <sub>1</sub> 2 <sub>1</sub> 2 <sub>1</sub>                         | <i>P</i> 2 <sub>1</sub> 2 <sub>1</sub> 2 <sub>1</sub>                | <i>P</i> 4 <sub>3</sub> 2             |
| Cell dimensions                                     |                                                                  |                                                                               |                                                                      |                                       |
| <i>a</i> , <i>b</i> , <i>c</i> (Å)                  | 105.5, 105.9, 108.1                                              | 105.3, 105.5, 107.9                                                           | 105.5, 106.1, 106.8                                                  | 100.9, 100.9, 100.9                   |
| $\alpha$ , $\beta$ , $\gamma$ (°)                   | 90, 90, 90                                                       | 90, 90, 90                                                                    | 90, 90, 90                                                           | 90, 90, 90                            |
| Resolution (Å)                                      | 48.14 - 2.18                                                     | 48.04 - 1.90                                                                  | 47.68 - 2.00                                                         | 45.13 - 2.30                          |
| <i>R</i> <sub>merge</sub>                           | 0.065 (0.72)                                                     | 0.07 (1.46)                                                                   | 0.14 (1.6)                                                           | 0.19 (2.5)                            |
| <i>R</i> <sub>pim</sub>                             | 0.032 (0.36)                                                     | 0.032 (0.66)                                                                  | 0.06 (0.65)                                                          | 0.03 (0.39)                           |
| <i>I</i> / $\sigma$ <i>I</i>                        | 12.4 (2.3)                                                       | 13.3 (1.2)                                                                    | 5.8 (1)                                                              | 24.3 (2.1)                            |
| <i>CC</i> <sub>1/2</sub>                            | 0.99 (0.71)                                                      | 0.97 (0.50)                                                                   | 0.99 (0.52)                                                          | 1 (0.73)                              |
| Completeness (%)                                    | 97.1 (93.4)                                                      | 100 (100)                                                                     | 100 (99.9)                                                           | 100 (99.7)                            |
| Redundancy                                          | 4.6 (4.6)                                                        | 6.8 (6.9)                                                                     | 6.8 (6.8)                                                            | 40.9 (41.6)                           |
| <b>Refinement</b>                                   |                                                                  |                                                                               |                                                                      |                                       |
| Resolution (Å)                                      | 47.4 - 2.18                                                      | 48.0 - 1.90                                                                   | 47.7 - 2.0                                                           | 45.1 - 2.3                            |
| No. reflections                                     | 61839                                                            | 95147                                                                         | 81366                                                                | 8248                                  |
| <i>R</i> <sub>work</sub> / <i>R</i> <sub>free</sub> | 0.19 / 0.23                                                      | 0.19 / 0.22                                                                   | 0.19 / 0.22                                                          | 0.18 / 0.2                            |
| No. atoms                                           |                                                                  |                                                                               |                                                                      |                                       |
| Protein                                             | 7952                                                             | 7970                                                                          | 7917                                                                 | 573                                   |
| Ppant/Gly <sub>stab</sub>                           | 42                                                               | 48                                                                            | 42                                                                   | -                                     |
| Ion (SO <sub>4</sub> )                              | -                                                                | -                                                                             | -                                                                    | 5                                     |
| Water                                               | 251                                                              | 607                                                                           | 451                                                                  | 56                                    |
| <i>B</i> -factors                                   |                                                                  |                                                                               |                                                                      |                                       |
| Protein                                             | 51.81                                                            | 43.55                                                                         | 44.82                                                                | 51.33                                 |
| Ppant/Gly <sub>stab</sub>                           | 87.02                                                            | 35.02                                                                         | 53.10                                                                | -                                     |
| Ion (SO <sub>4</sub> )                              | -                                                                | -                                                                             | -                                                                    | 116.9                                 |
| Water                                               | 50.69                                                            | 44.29                                                                         | 48.18                                                                | 58.2                                  |
| R.m.s. deviations                                   |                                                                  |                                                                               |                                                                      |                                       |
| Bond lengths (Å)                                    | 0.003                                                            | 0.004                                                                         | 0.005                                                                | 0.006                                 |
| Bond angles (°)                                     | 0.69                                                             | 0.64                                                                          | 0.80                                                                 | 0.82                                  |

<sup>a</sup> Number of crystals = 1

**Supplementary Table 2. Similar structures to the PCP<sub>2</sub> domain (PDB ID 7KVW) as identified by DALI.<sup>1</sup>**

|   | <b>PDB-ID</b> | <b>Z-score</b> | <b>RMSD</b> | <b>% identity</b> | <b>Description</b>                       |
|---|---------------|----------------|-------------|-------------------|------------------------------------------|
| 1 | 6VTJ-A        | 14.4           | 1.3         | 32                | PCP-R NON-RIBOSOMAL PEPTIDE SYNTHETASE*  |
| 2 | 4ZXI-A        | 13.8           | 1.2         | 31                | HOLO-AB3403 C-A-PCP-TE <sup>2</sup>      |
| 3 | 4MRT-C        | 13.8           | 1.5         | 31                | SFP/PCP COMPLEX <sup>3</sup>             |
| 4 | 4ZXH-A        | 13.7           | 1.3         | 31                | HOLO-AB3403 C-A-PCP-TE <sup>2</sup>      |
| 5 | 4NEO-A        | 13.4           | 1.1         | 28                | BLEOMYCIN NRPS TYPE II-PCP <sup>4</sup>  |
| 6 | 3TEJ-B        | 13.3           | 1.3         | 35                | PCP/ TE COMPLEX <sup>5</sup>             |
| 7 | 2JGP-A        | 13.3           | 1.4         | 42                | TYCC5-6 PCP-C NRPS DIDOMAIN <sup>6</sup> |
| 8 | 5T3D-A        | 13.2           | 1.4         | 36                | HOLO-ENTF NRPS <sup>2</sup>              |

\*unpublished

**Supplementary Table 3. Similar structures to the C<sub>3</sub> domain (PDB ID 7KVW) as identified by DALI.<sup>1</sup>**

|   | <b>PDB-ID</b> | <b>Z-score</b> | <b>RMSD</b> | <b>% identity</b> | <b>Description</b>                                |
|---|---------------|----------------|-------------|-------------------|---------------------------------------------------|
| 1 | 4TX2-B        | 43.4           | 2.6         | 34                | TEICOPLANIN X-DOMAIN <sup>7</sup>                 |
| 2 | 6MFY-A        | 43.3           | 2.3         | 27                | LINEAR GRAMICIDIN SYNTHASE SUBUNIT A <sup>8</sup> |
| 3 | 6MFW-A        | 42.6           | 2.3         | 27                | LINEAR GRAMICIDIN SYNTHASE SUBUNIT A <sup>8</sup> |
| 4 | 4TX3-B        | 42.3           | 2.8         | 34                | TEICOPLANIN X-DOMAIN / OXYB COMPLEX <sup>7</sup>  |
| 5 | 6MFX-A        | 41.9           | 2.3         | 27                | LINEAR GRAMICIDIN SYNTHASE SUBUNIT A <sup>8</sup> |
| 6 | 2JGP-A        | 41             | 3.1         | 28                | TYROCIDINE SYNTHETASE 3 <sup>6</sup>              |
| 7 | 6M7L-B        | 40.7           | 3.3         | 34                | KISTAMICIN X-DOMAIN <sup>9</sup>                  |
| 8 | 6MFZ-A        | 40.7           | 2.3         | 27                | LINEAR GRAMICIDIN SYNTHASE SUBUNIT A <sup>8</sup> |



**Supplementary Table 4. Interface residues in the PCP<sub>2</sub>-C<sub>3</sub> complex as identified by PISA (PDB ID 7KVV chain A).<sup>10</sup>**

| PCP residues*      | ASA    | BSA    | Buried Fraction | $\Delta^iG^{\#}$ |
|--------------------|--------|--------|-----------------|------------------|
| F2508              | 72.20  | 57.3   | 0.8             | 0.54             |
| A2509              | 87.46  | 18.39  | 0.2             | 0.23             |
| G2511              | 55.01  | 3.96   | 0.1             | 0.05             |
| G2512              | 6.50   | 3.30   | 0.5             | -0.04            |
| H2513              | 106.14 | 33.38  | 0.3             | 0.23             |
| S2514              | 54.01  | 24.98  | 0.5             | 0.34             |
| L2515              | 134.80 | 70.67  | 0.5             | 1.06             |
| L2518              | 96.57  | 53.84  | 0.6             | 0.86             |
| R2519              | 135.36 | 19.66  | 0.1             | -0.08            |
| V2534              | 29.82  | 22.68  | 0.8             | 0.36             |
| R2535              | 180.72 | 83.47  | 0.5             | 0.40             |
| F2538              | 113.79 | 92.67  | 0.8             | 1.23             |
| E2539              | 136.65 | 40.45  | 0.3             | -0.13            |
| C-domain residues* | ASA    | BSA    | Buried Fraction | $\Delta^iG^{\#}$ |
| R2576              | 100.93 | 3.22   | 0.1             | -0.03            |
| W2579              | 28.16  | 8.45   | 0.3             | 0.14             |
| L2580              | 95.62  | 64.60  | 0.7             | 1.03             |
| Q2583              | 98.71  | 19.38  | 0.2             | 0.11             |
| V2584              | 87.07  | 53.57  | 0.6             | 0.84             |
| D2630              | 158.67 | 20.61  | 0.2             | -0.21            |
| D2631              | 148.29 | 7.89   | 0.1             | -0.09            |
| G2632              | 17.44  | 11.88  | 0.6             | 0.19             |
| P2633              | 19.32  | 12.22  | 0.7             | 0.20             |
| A2783              | 89.79  | 19.70  | 0.2             | 0.17             |
| T2784              | 97.52  | 24.26  | 0.2             | 0.39             |
| D2900              | 72.84  | 33.29  | 0.5             | -0.16            |
| K2903              | 147.00 | 48.49  | 0.3             | -0.22            |
| R2906              | 138.20 | 108.61 | 0.8             | -0.45            |
| A2907              | 43.76  | 32.72  | 0.7             | 0.50             |
| V2908              | 81.67  | 67.39  | 0.8             | 1.02             |
| S2909              | 23.81  | 3.43   | 0.1             | -0.04            |

\* residues highlighted in green are central to the PCP/C hydrophobic interface

# indicates the solvation energy of the corresponding residue, in kcal/M. The solvation energy gain of the interface is calculated as difference in solvation energies of all residues between dissociated and associated (interfacing) structures. Therefore, positive solvation energy  $\Delta^iG$  of a residue makes a negative contribution to the solvation energy gain of the interface, which corresponds to hydrophobic effect. See reference #10.

**Supplementary Table 5. Interactions between interface residues (identified by PISA)<sup>10</sup> in the PCP<sub>2</sub>-C<sub>3</sub> complex (PDB ID 7KVV chain A).**

| PCP residue | C-domain residue                         | PCP residue | C-domain residue           |
|-------------|------------------------------------------|-------------|----------------------------|
| F2508       | R2906                                    | L2518       | W2579, L2580, Q2583, V2584 |
| A2509       | K2903                                    | R2519       | D2630, D2631               |
| G2511       | D2900                                    | V2534       | Q2583, V2584, V2908        |
| G2512       | D2900                                    | R2535       | A2783, T2784, V2908, S2909 |
| H2513       | D2900                                    | F2538       | V2584, R2906, A2907, V2908 |
| S2514       | V2584, R2906                             | E2539       | A2783, V2908               |
| L2515       | R2576, W2579, L2580, D2631, G2632, P2633 |             |                            |

**Supplementary Table 6. Primer sequences and Spytag/Spycatcher sequences used in this study.**

| Construct                                                    | Primer   | Sequence                                                                                                                                                                                                                                                                                                           |
|--------------------------------------------------------------|----------|--------------------------------------------------------------------------------------------------------------------------------------------------------------------------------------------------------------------------------------------------------------------------------------------------------------------|
| PCP <sub>2</sub> -C <sub>3</sub><br>(V2481-A2803)            | 1 (Fwd)  | 5'-GAACAGATCGGTGGTGTACCCGCTACGAGGAGA-3'                                                                                                                                                                                                                                                                            |
|                                                              | 2 (Rev)  | 5'-GTCTAGAAAAGCTCTATGCCCCGACACCACT-3'                                                                                                                                                                                                                                                                              |
| PCP <sub>3</sub> (pET28)<br>(V3521-E3598)                    | 3 (Fwd)  | 5'-CACCATCACCATCACGGAAGCGTCCGCGAACCCGCAAC-3'                                                                                                                                                                                                                                                                       |
|                                                              | 4 (Rev)  | 5' GCCGGATCAAGCTTACTCGGTGACGGGCTGG-3'                                                                                                                                                                                                                                                                              |
| PCP <sub>3</sub> (pHIS17)<br>(V3521-E3598)                   | 5 (Fwd)  | 5'-GGATCCCATCATCATCATCATTAAAAGCT-3'                                                                                                                                                                                                                                                                                |
|                                                              | 6 (Rev)  | 5'-ATGTATATCTCCTTCTTAAAGTTAAACAAAATTATTTCTAGAGGGA-3'                                                                                                                                                                                                                                                               |
| PCP <sub>2</sub> -C <sub>3</sub><br>R2577G                   | 7 (Fwd)  | 5'-CACTTCCAGCGGGGGCTCTGGCTCA-3'                                                                                                                                                                                                                                                                                    |
|                                                              | 8 (Rev)  | 5'-TGAGCCAGAGCCCCGCTGGAAGTG-3'                                                                                                                                                                                                                                                                                     |
| PCP <sub>2</sub> -C <sub>3</sub><br>H2697Q                   | 9 (Fwd)  | 5'-TCGTCTGCCACCAGATTGCCGCAGACG-3'                                                                                                                                                                                                                                                                                  |
|                                                              | 10 (Rev) | 5'-CGTCTGCGGCAATCTGGTGGCAGACGA-3'                                                                                                                                                                                                                                                                                  |
| PCP <sub>2</sub> -C <sub>3</sub><br>E2702G                   | 11 (Fwd) | 5'-CATTGCCGAGACGGGTGGTCTTTCGCGC-3'                                                                                                                                                                                                                                                                                 |
|                                                              | 12 (Rev) | 5'-GCGCGAAAGACCACCCGTCTGCGGCAATG-3'                                                                                                                                                                                                                                                                                |
| pET28                                                        | 13 (Fwd) | 5'-TAAGCTTGATCCGGCTGCTAACAA-3'                                                                                                                                                                                                                                                                                     |
|                                                              | 14 (Rev) | 5'-GTGATGGTATGGTATGTTTCATGG-3'                                                                                                                                                                                                                                                                                     |
| pOPINS                                                       | 15 (Fwd) | 5'-TAGAGCTTTCTAGACCATTTAAACACCACCAC                                                                                                                                                                                                                                                                                |
|                                                              | 16 (Rev) | 5'-ACCACCGATCTGTTTCGCG                                                                                                                                                                                                                                                                                             |
| p17HIS                                                       | 17 (Fwd) | 5'-GGATCCCATCATCATCATCATTAAAAGCT-3'                                                                                                                                                                                                                                                                                |
|                                                              | 18 (Rev) | 5'-ATGTATATCTCCTTCTTAAAGTTAAACAAAATTATTTCTAGAGGGA-3'                                                                                                                                                                                                                                                               |
| SpyCatcher                                                   | 19 (Fwd) | 5'-GTGGTGTGCGGGGCAATGACAATTGAAGAAGATAGTGCTACCCA-3'                                                                                                                                                                                                                                                                 |
|                                                              | 20 (Rev) | 5'-GTCTAGAAAAGCTCTAAATATGAGCGTCACCTTTAGTTGCTTTGC-3'                                                                                                                                                                                                                                                                |
| PCP <sub>2</sub> C <sub>3</sub> in<br>pOPINS -<br>SpyCatcher | 21 (Fwd) | 5'-TAGAGCTTTCTAGACCATTTAAACACCACCAC-3'                                                                                                                                                                                                                                                                             |
|                                                              | 22 (Rev) | 5'-TGCCCCCGACACCACTC-3'                                                                                                                                                                                                                                                                                            |
| SpyTag                                                       | 23 (Fwd) | 5'-GGAGATATACATATGGGAGCCACATCGTG-3'                                                                                                                                                                                                                                                                                |
|                                                              | 24 (Rev) | 5'-TGCGGGTTCGCGGACACCACTTTACCACTACCCTT-3'                                                                                                                                                                                                                                                                          |
| PCP <sub>3</sub> in pHIS17<br>- SpyTag                       | 25 (Fwd) | 5'-GTCCGCGAACCCGCAACC-3'                                                                                                                                                                                                                                                                                           |
|                                                              | 26 (Rev) | 5'-CATATGTATATCTCCTTCTTAAAGTTAAACAAAATTATTTCTAGAGGGA-3'                                                                                                                                                                                                                                                            |
| Spycatcher                                                   |          | ATGACAATTGAAGAAGATAGTGCTACCCATATTAATTTCTCAAAACGTGATGAGGACGGCAAAG<br>AGTTAGCTGGTGAACACTATGGAGTTGCGTGATTTCATCTGGTAAAACCTATTAGTACATGGATTTC<br>GATGGACAAGTGAAGATTTTACCTGTATCCAGGAAAAATACATTTGTCGAAACCCGAGCACC<br>AGACGGTTATGAGGTAGCAACTGCTATTACCTTTACAGTTAATGAGCAAGGTCAGGTTACTGTAA<br>ATGGCAAAGCAACTAAAGGTGACGCTCATATT |
| Spytag                                                       |          | GGAGCCACATCGTGATGGTGGACGCCTACAAGCCGACGAAGGGTAGTGGTGAAAGTGGT                                                                                                                                                                                                                                                        |

## Supplementary Discussion

**Computational investigation of the mechanism of peptide bond formation.** Density functional theory (DFT) computations were performed to explore the mechanism of peptide bond formation catalyzed by the C-domain. Two plausible mechanisms were studied. The first mechanism, shown in **Figure 5c** (upper pathway), was a concerted process in which the nucleophilic amine group is deprotonated by the active-site histidine residue at the same time as the amine attacks the thioester to form the new N–C bond. Our DFT calculations<sup>11</sup> with the B3LYP-D3 functional<sup>12-16</sup> and 6-31G(d) basis set in implicit diethyl ether ( $\epsilon = 4.24$ , chosen to model the dielectric constant of the interior of an enzyme, and modelled with the SMD implicit model<sup>17</sup>) were unable to locate the transition state (TS) for the concerted process. Even in the presence of a small number of explicit water molecules to stabilize the developing oxyanion, these structures could not be located on the potential energy surface; they instead spontaneously collapsed to the transition states or intermediates of the alternative non-concerted mechanism. The second plausible mechanism, shown in **Figure 5c** (lower pathway), was a stepwise process. In this mechanism, the nucleophilic attack on the thioester and the deprotonation of the amine take place sequentially in separate chemical steps. In contrast to the concerted process, it was readily possible to calculate transition states and zwitterionic tetrahedral intermediates for this type of mechanism. We calculated several variants, differing with respect to the number and placement of water molecules around the oxyanion. With no water molecules located near the oxyanion, the zwitterionic intermediate was not stable and instead spontaneously dissociated back to the reactants. However, when one or more water molecules were present forming hydrogen bonds to the  $O^-$ , the zwitterion could be located as a stable structure. A variety of zwitterionic intermediates, and corresponding transition states, stabilized by one, two, or three water molecules, were located. A representative example is shown in **Figure 5c** (right hand side). Importantly, as illustrated by the structure in **Figure 5c**, even when the histidine was positioned close to the ammonium group of the zwitterion, proton transfer did not occur spontaneously. Instead, it took place in a separate chemical step with its own energy barrier. Based on these results, the most likely mechanism of peptide bond formation appears to be the sequential process shown in the lower pathway of **Figure 5c**. Whilst we have used water molecules as model hydrogen bond donors in our calculations, it is likely that in the enzyme active site, other hydrogen bond donors could alternatively serve in a similar role to stabilize the oxyanion. Furthermore, computations indicated that after the zwitterionic intermediate has been formed, the subsequent N-deprotonation and C–S cleavage processes could occur either in concert or sequentially.

## Supplementary Figures

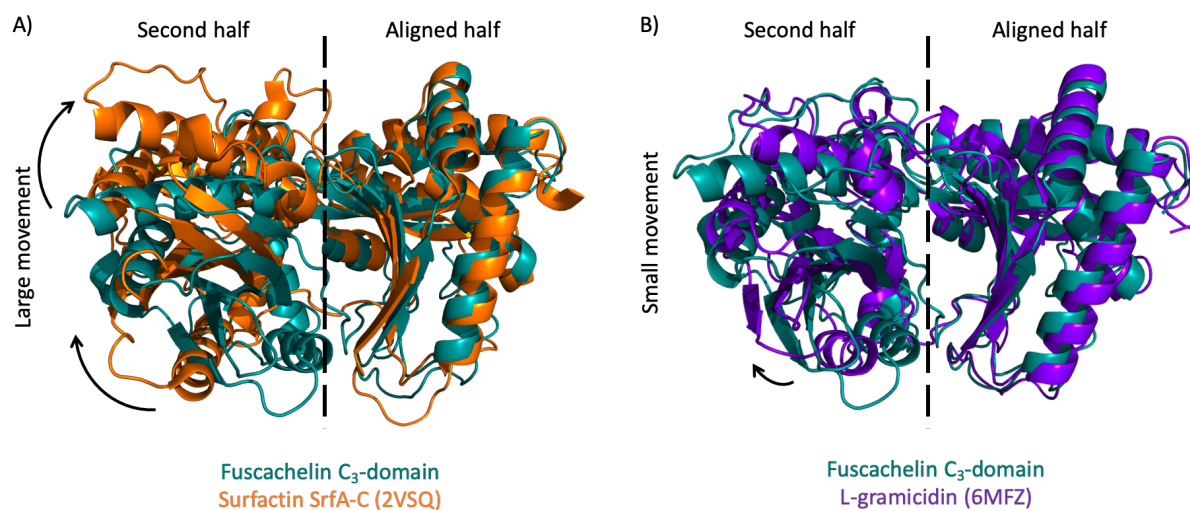

**Supplementary Figure 1. Structural alignment (superposition) of the fuscachelin synthetase C<sub>3</sub> domain with C domains from surfactin and linear gramicidin.** A) Structural alignment of the C-terminal half of fuscachelin synthetase C<sub>3</sub> domain (PDB ID 7KVW) with surfactin SrfA-C (2VSQ) showing a large movement of the N-terminal portion of the domain. B) Superposition of the C-terminal half of fuscachelin synthetase C<sub>3</sub> domain with L-gramicidin synthetase C-domain (6MFZ) showing a small movement of the N-terminal portion of the domain.

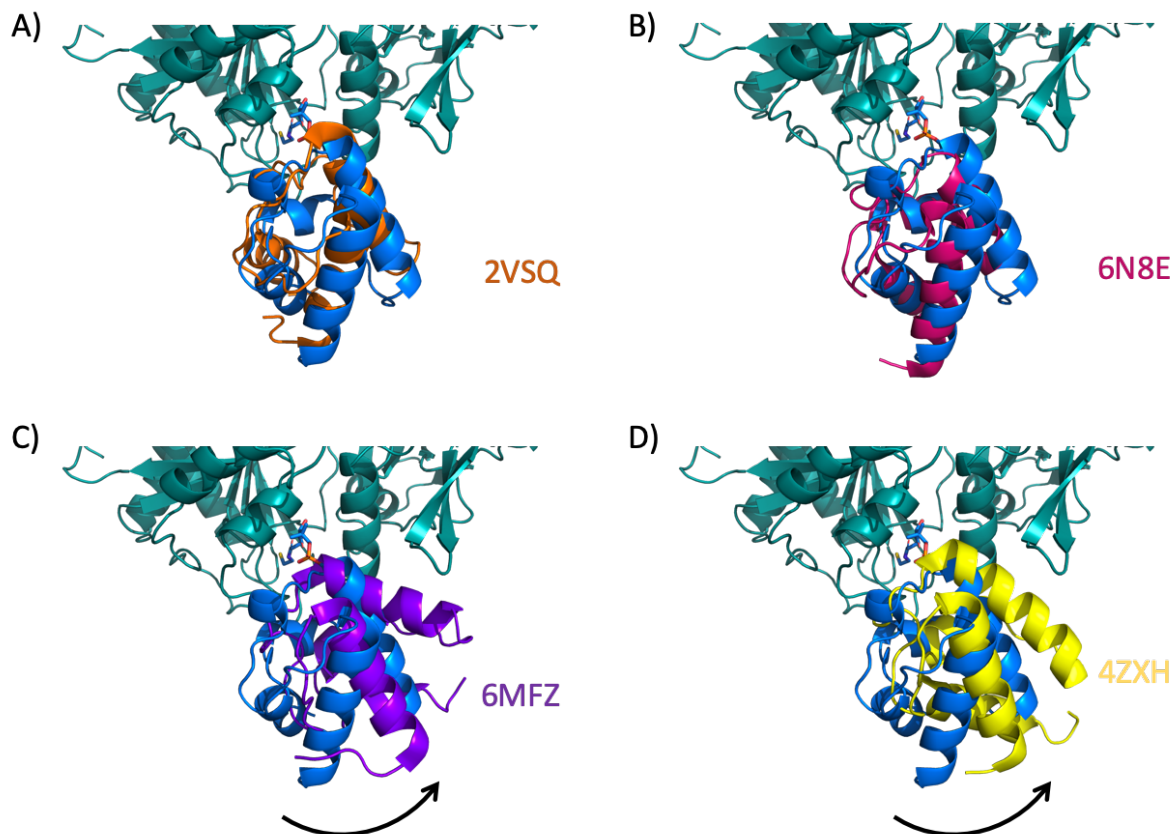

**Supplementary Figure 2. Superposition of PCP-C structures that displays the PCP-orientation relative to the C domain.** A) Superposition of the fuscachelin PCP<sub>2</sub>-C<sub>3</sub> structure (PDB ID 7KVW) with SrfA-C (PDB ID 2VSQ). B) Superposition of the fuscachelin PCP<sub>2</sub>-C<sub>3</sub> structure with ObiF1 (PDB ID 6N8E). C) Superposition of the fuscachelin PCP<sub>2</sub>-C<sub>3</sub> structure with LgrA (PDB ID 6MFZ). D) Superposition of the fuscachelin PCP<sub>2</sub>-C<sub>3</sub> structure with AB3403 (PDB ID 4ZXH). The structures of SrfA-C and ObiF1 are similar to the fuscachelin PCP<sub>2</sub> domain whereas AB3403 and LgrA display a different rotation around the conserved serine.

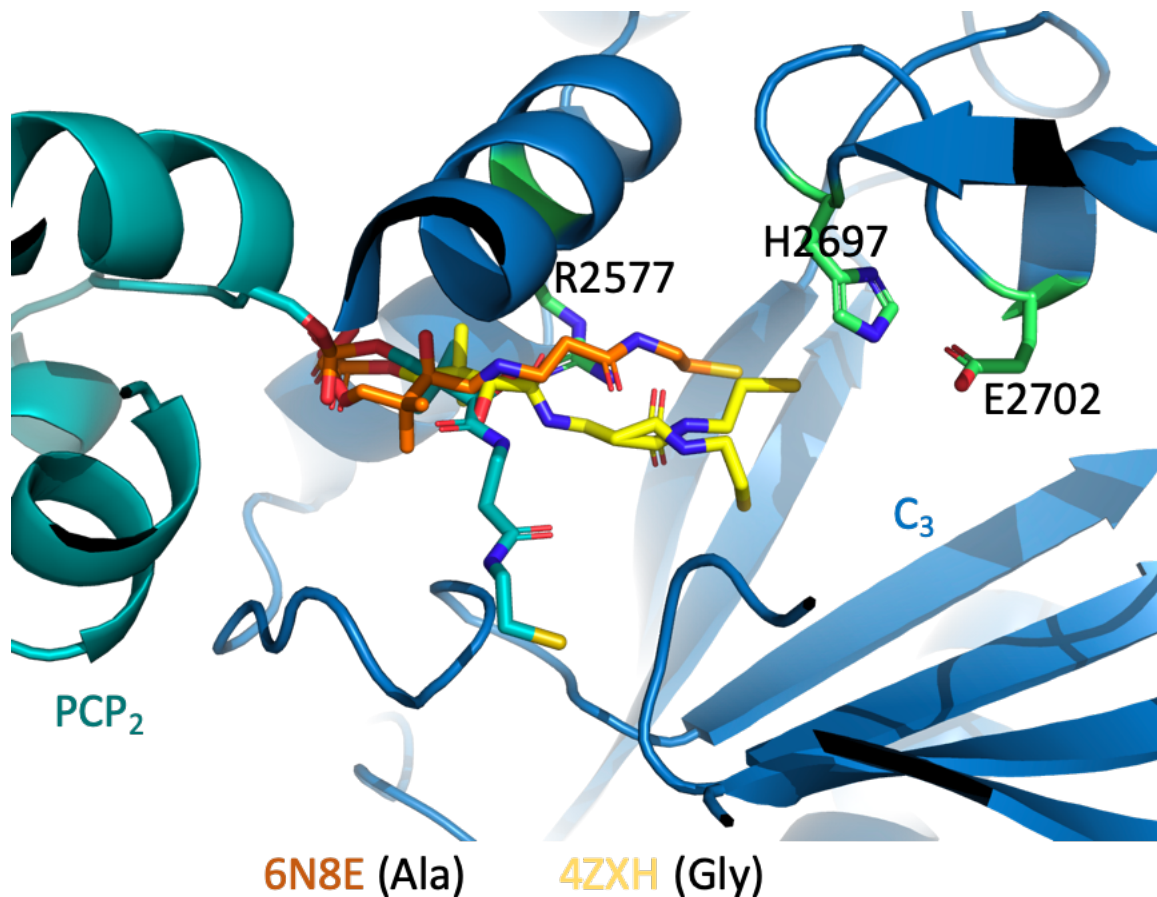

**Supplementary Figure 3. Superposition of the fuscachelin PCP<sub>2</sub>-C<sub>3</sub> didomain (PDB ID 7KVW) with C domains containing a PPant-modified PCP-domain (AB3403 (PDB ID 4ZXH) and ObiF1 (PDB ID 6N8E)).** When comparing the structures, it is apparent that the R2577 side chain prevents PPant access to the C domain active site; in the other structures this is present as a small residue (see bottom of figure).

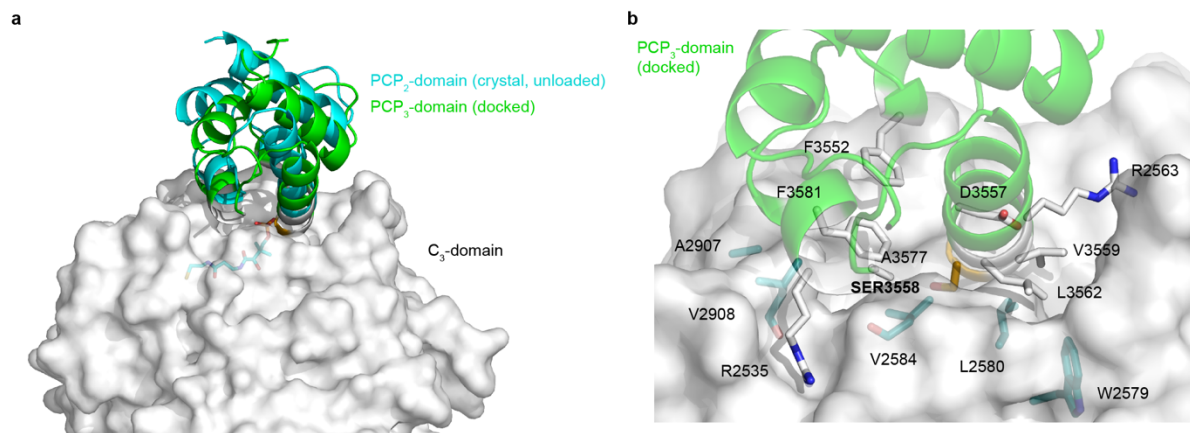

**Supplementary Figure 4. Computational rigid body protein-protein docking of PCP<sub>3</sub> onto the acceptor PCP binding site of the C<sub>3</sub> domain.** (a) Structural overlay of the top scoring pose of PCP<sub>3</sub> (7KW3) docked onto the acceptor PCP binding site of C<sub>3</sub>-domain (green; from 7KVW) and the (unloaded) PCP<sub>2</sub>-C<sub>3</sub> didomain complex (PCP<sub>2</sub> in cyan; 7KVW) as determined by computational rigid-body docking. (b) Residues at the interface between the computationally docked PCP<sub>3</sub> (top pose) and C<sub>3</sub>. C<sub>3</sub> domain residues are colored teal, while key PCP<sub>3</sub> domain interface residues are shown as white sticks. The key serine residue (Ser3558) is colored orange.



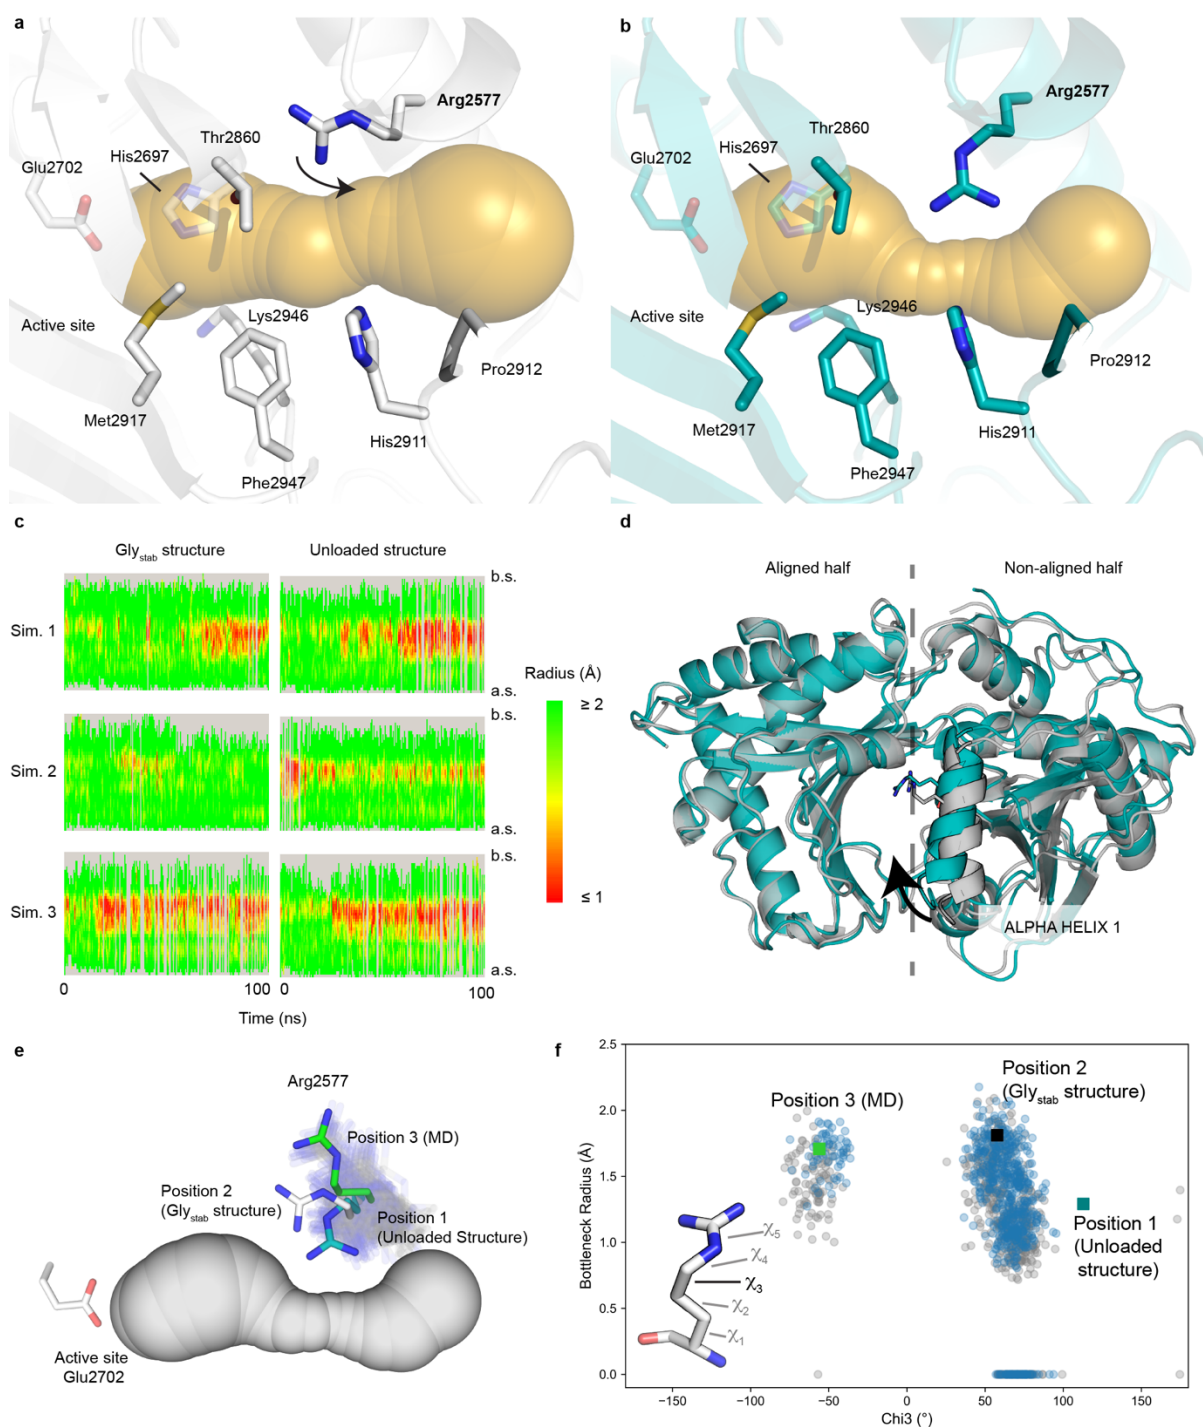

**Supplementary Figure 5. Tunnel analysis combined with molecular dynamics (MD) simulations highlight the intrinsic dynamics of the acceptor substrate tunnel.** (a-b) CAVER<sup>18</sup> tunnel analysis of the acceptor substrate tunnel of C<sub>3</sub> from the (a) Gly<sub>stab</sub>-PPant crystal structure (PDB ID 7KW0 Chain A) and (b) unloaded PPant crystal structure (PDB ID 7KVW Chain A) highlight differences in the tunnel profiles (gold volumes) and that Arg2577 is a key bottleneck-lining residue. Simulations were initiated from the isolated structures of the C<sub>3</sub> domain, with the PCP domain and PPant moiety removed. (c) Heatmaps showing how the profile of the acceptor tunnel changes over the course of triplicate (n=3) 100 ns MD simulations initiated from these two structures (with PPants removed). The tunnel bottleneck (red) occurs halfway along the tunnel between the active site (a.s.) and bulk solvent (b.s.). (d)



Structural alignment of C<sub>3</sub> from the unloaded-PPant structure (Chain A, teal) and a snapshot taken from a MD simulation (grey) of this protein. The size of the acceptor tunnel is primarily determined by the rotameric state of Arg2577 (sticks), but is also influenced by larger scale motions, including the displacement of alpha helix 1. (e) During simulations, Arg2577 samples rotamers corresponding to those found in the unloaded PPant crystal structure (position 1, teal) and Gly<sub>stab</sub> crystal structure (position 2, white), but also samples a number of other states (grey cloud), including a distinct third position (green, Chi3= -80° to -40°). (f) Analysis of snapshots from MD simulations of C<sub>3</sub> from the unloaded-PPant (grey) and Gly<sub>stab</sub>-PPant (blue) structures show that when Arg2577 is in this third position the tunnel remains open (bottleneck radius > 1 Å). In contrast, rotation of Arg2577 towards the tunnel (Chi3 = 30° to 100°) is associated with smaller tunnels. Tunnels with bottleneck radii smaller than that of the probe sphere (0.7 Å) were given a bottleneck radius of 0 Å. Source Data for (c) and (f) available in the Source Data file.

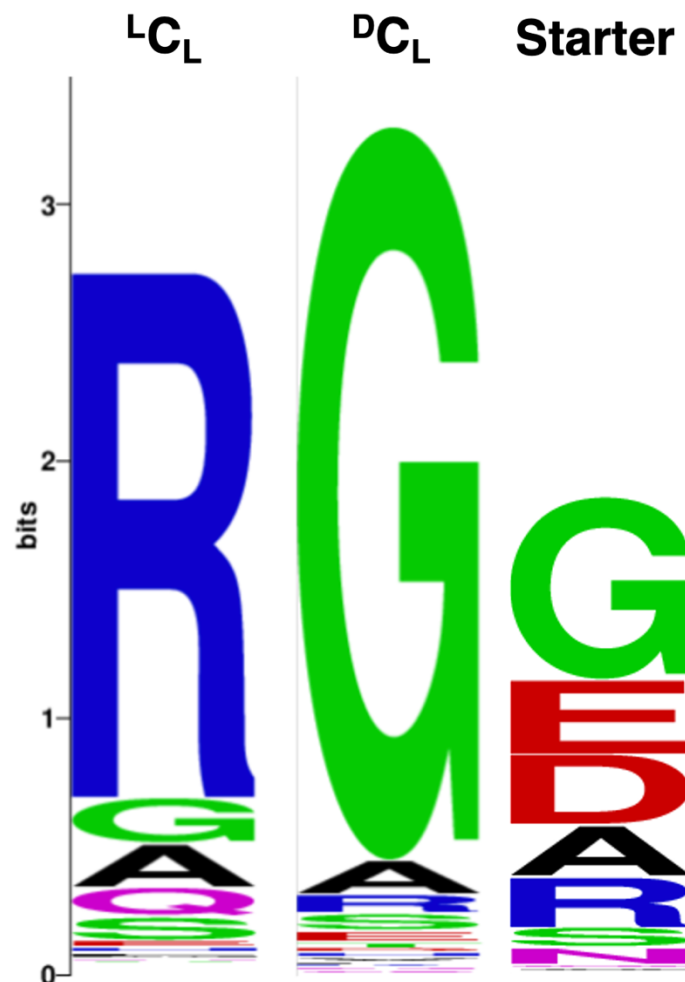

**Supplementary Figure 6. Sequence Logos of the R2577 residue of the PCP<sub>2</sub>-C<sub>3</sub> didomain for C domains with <sup>L</sup>C<sub>L</sub> selectivity (1456 sequences), <sup>D</sup>C<sub>L</sub> selectivity (593 sequences) and starter C domains (152 sequences) taken from the MiBiG database. The arginine residue is largely conserved (in 72.9% of cases found) in C domains conforming to <sup>L</sup>C<sub>L</sub> selectivity, while glycine is the most prominent residue in cases of <sup>D</sup>C<sub>L</sub> selectivity (in 80.1% of cases found).**

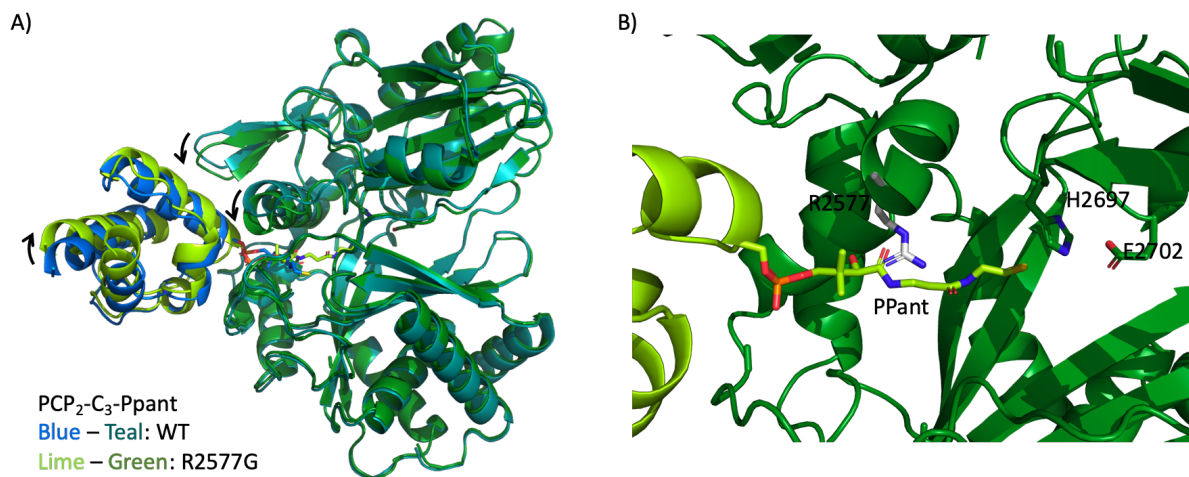

**Supplementary Figure 7. Crystal structure of the R2577 mutant of the PCP<sub>2</sub>-C<sub>3</sub> protein.** A) Superposition of the R2577G mutant (PDB ID 7KW2) onto the wild type protein. B) Close-up of the acceptor channel with the PPant extending towards the catalytic site. The mutated arginine residue is shown as white sticks.

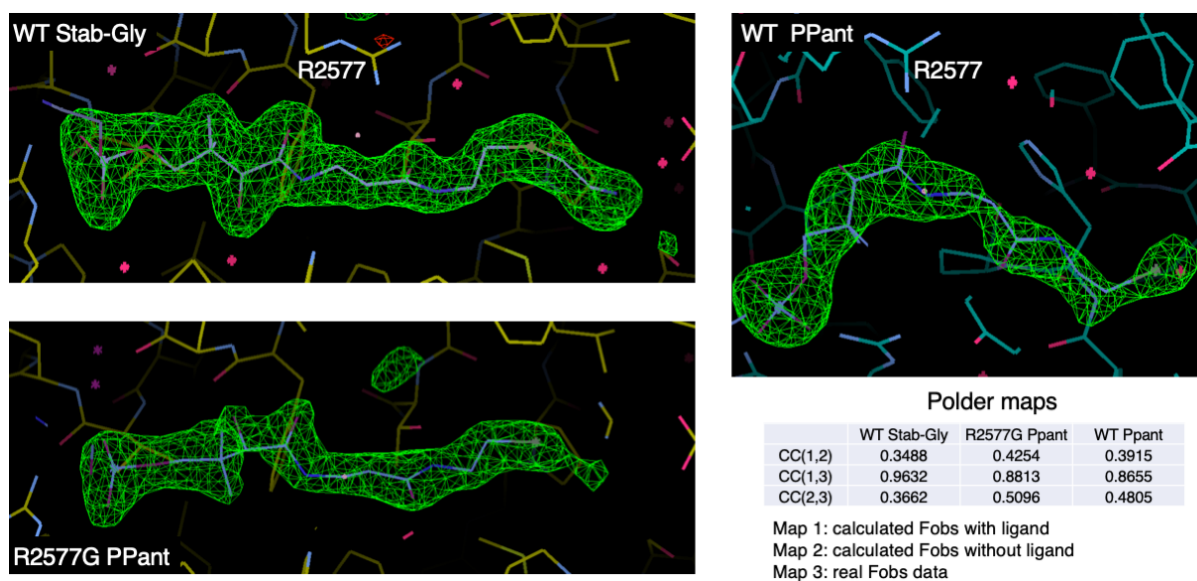

**Supplementary Figure 8. Polder maps showing the electron density for the expected PCP-substrates.** Correlation coefficients (CC) shown bottom right. WT Stab-Gly 7KW0, WT PPant 7KVV, R2577G PPant 7KW2.

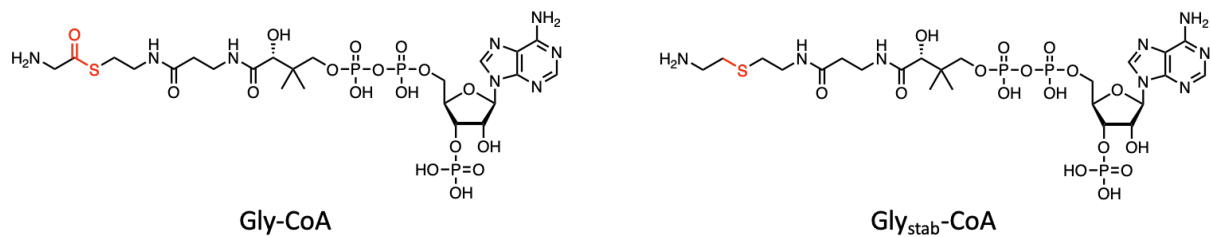

**Supplementary Figure 9. Chemical structures of Gly-CoA (aminoacyl-CoA) and the stabilized Gly<sub>stab</sub>-CoA (modified Gly-CoA).**

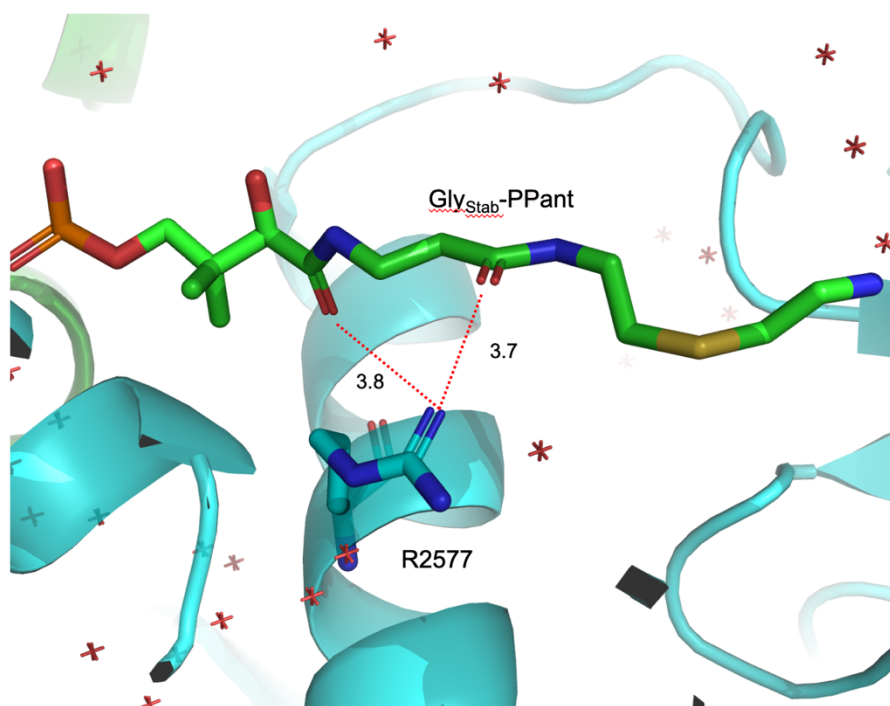

**Supplementary Figure 10. Interactions of R2577 with the PPant arm in the Gly<sub>stab</sub> structure (7KW0). H-bonds shown as red dotted lines, distances indicated in Angstroms (Å).**

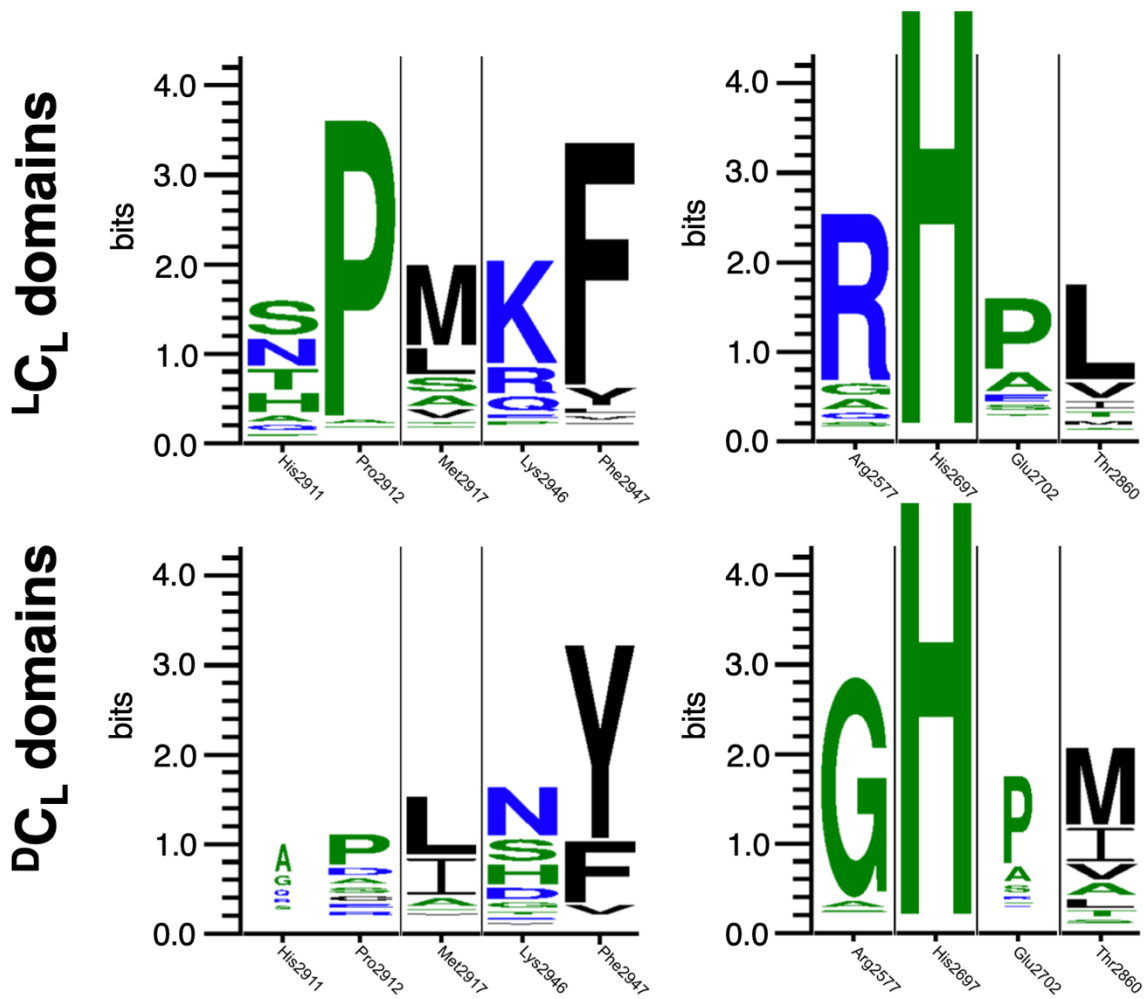

**Supplementary Figure 11. Sequence Logos of the PPant interacting residues of the PCP<sub>2</sub>-C<sub>3</sub> didomain for C domains with <sup>L</sup>C<sub>L</sub> selectivity (350 sequences) and <sup>D</sup>C<sub>L</sub> selectivity (113 sequences) taken from the MiBiG database. Residue numbering and identities taken from the fuscachelin PCP<sub>2</sub>-C<sub>3</sub> sequence and structures.**

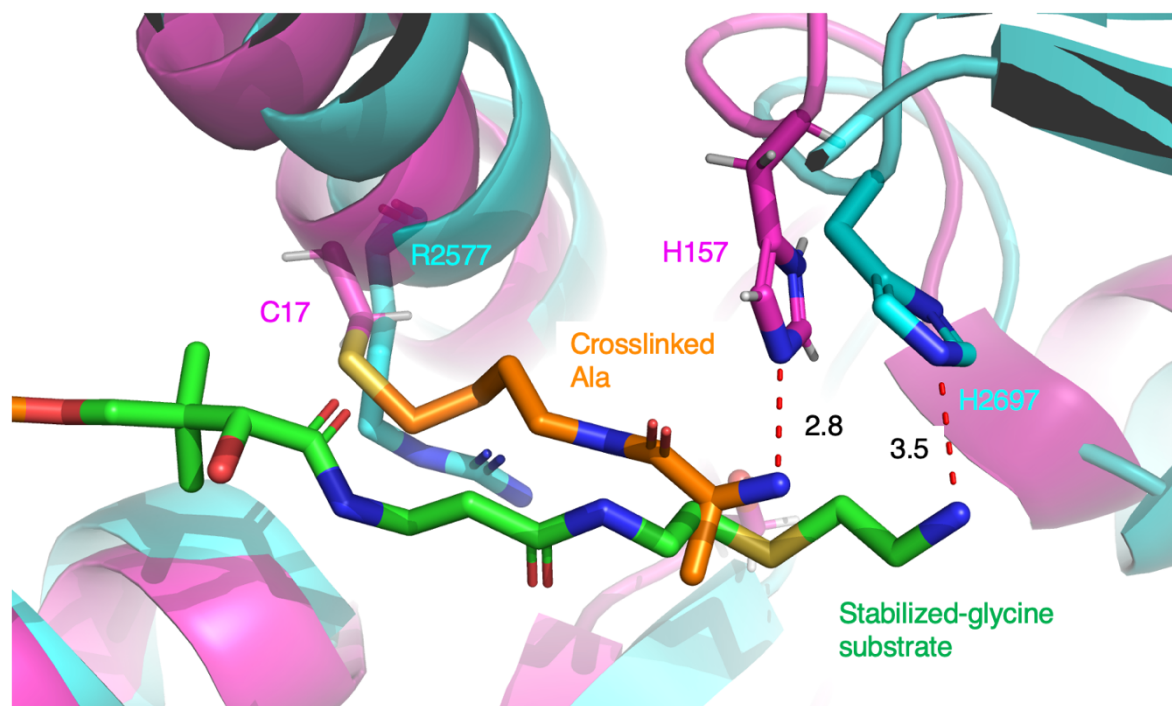

**Supplementary Figure 12. Comparison of the structures of a C domain containing a crosslinked acceptor mimic (PDB ID 5DU9) the Gly<sub>stab</sub> structure (PDB ID 7KW0).** The amine of the Gly<sub>stab</sub> structure enters the C domain active site by a further 3.6 Å than the crosslinked Ala moiety. 5DU9 structure shown in magenta with the acceptor mimic shown in orange sticks; 7KW0 structure shown in cyan with the PPant/Gly<sub>stab</sub> moiety shown in green sticks. H-bonds shown as red dotted lines, distances indicated in Angstroms (Å).

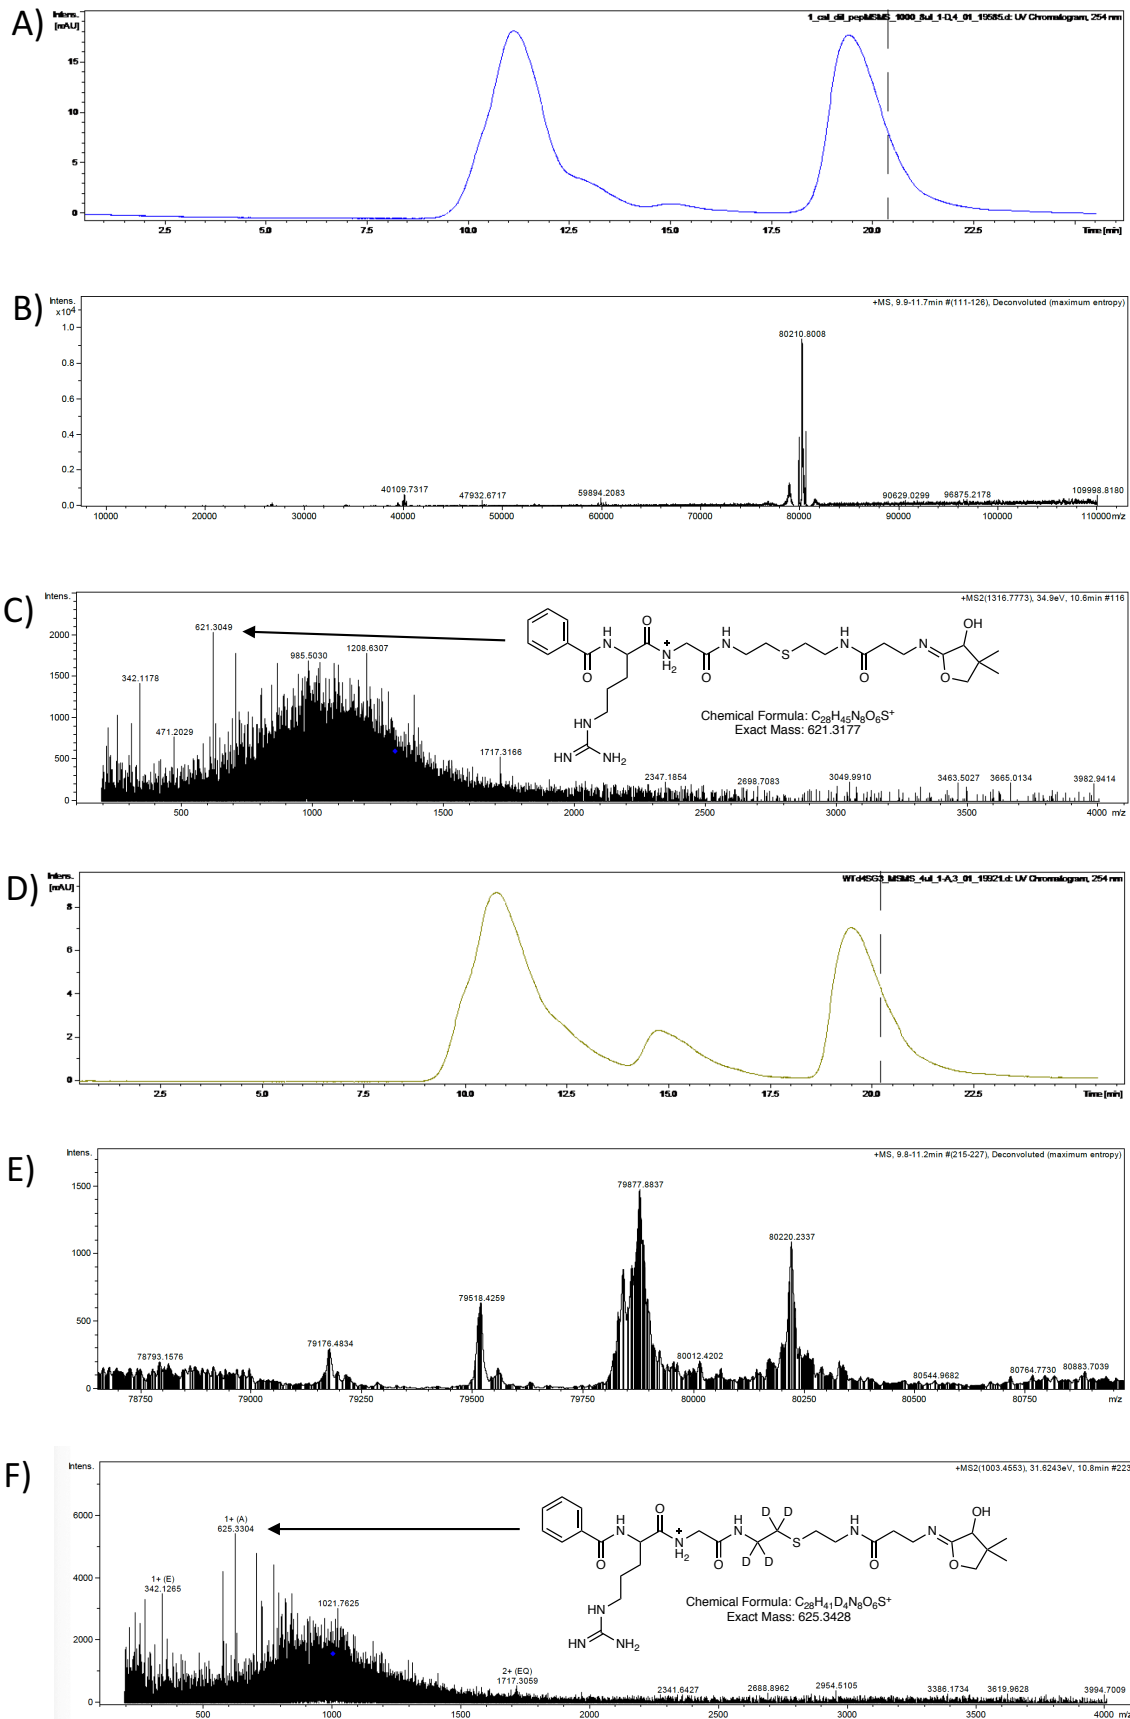

**Supplementary Figure 13. PPant ejection results showing extension of Gly<sub>stab</sub>.** NanoLC-MS analyses indicating the reconstitution of PCP<sub>2</sub>-C<sub>3</sub>::PCP<sub>3</sub> WT for BA-D-Arg-Gly donor peptide together with

Gly<sub>stab</sub>-CoA (A-C) or *d*<sub>4</sub>-Gly<sub>stab</sub>-CoA (D-F) as an acceptor substrate. A) UV trace of chromatogram with the protein eluting at 11 minutes. B) Deconvoluted spectrum showing the [M]<sup>+</sup> masses observed. C) MS<sup>2</sup> spectrum of the 76+ charged ion 1056 (calculated for C<sub>28</sub>H<sub>45</sub>N<sub>8</sub>O<sub>6</sub>S<sup>+</sup> [M+H]<sup>+</sup>: 621.32, found: 621.31). D) UV trace of chromatogram with the protein eluting at 11 minutes. E) Deconvoluted spectrum showing the [M]<sup>+</sup> masses observed. F) MS<sup>2</sup> spectrum of the 80+ charged ion 1003 (calculated for C<sub>28</sub>H<sub>41</sub>D<sub>4</sub>N<sub>8</sub>O<sub>6</sub>S<sup>+</sup> [M+H]<sup>+</sup>: 625.34, found: 625.33). Use of the *d*<sub>4</sub>-labeled substrate allowed confirmation of the identity of the PPant ejection peak due to the 4 Da shift in mass.

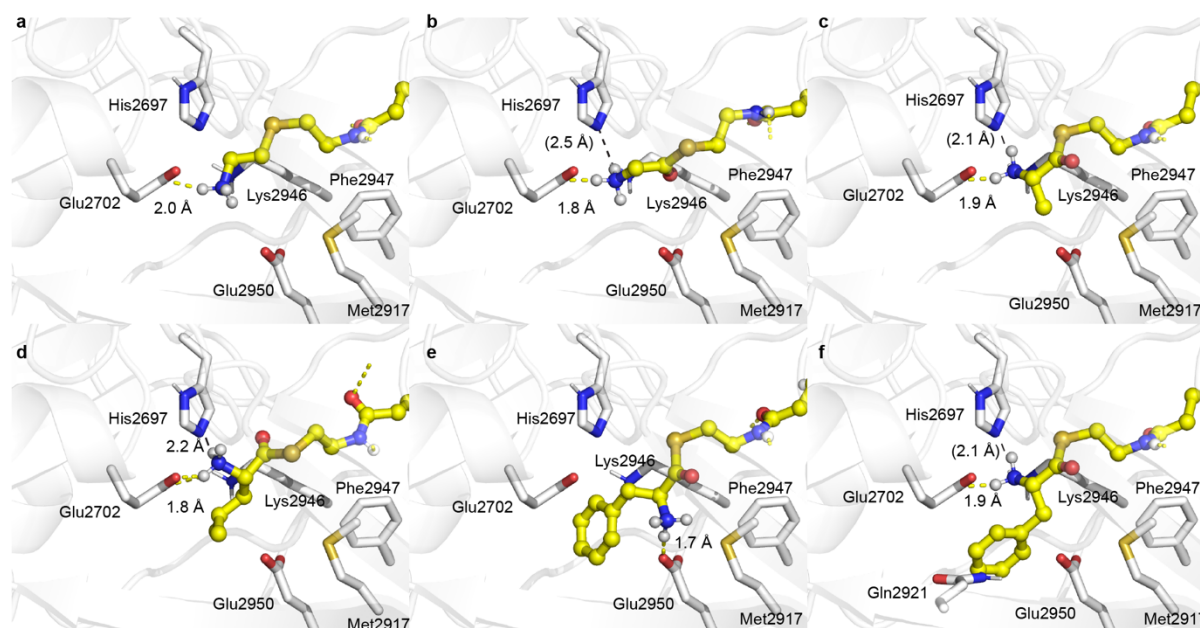

**Supplementary Figure 14. Top poses of alternate acceptor substrates computationally docked into the C<sub>3</sub> domain (7KW2).** Top-scoring poses of docked substrates in the C<sub>3</sub> domain (using chain A, residues 2558 – 2999 of the Gly<sub>stab</sub> PCP<sub>2</sub>-C<sub>3</sub> didomain structure). Panels show (a) Gly<sub>stab</sub>, (b) Gly, (c) L-Ala, (d) L-Leu and (e) L-Phe docked into the C<sub>3</sub> domain. (f) Using the top pose of docked L-Ala as the template and manually building out the side chain of L-Phe, followed by testing of all possible rotamers showed that this bulky sidechain clashed with active site pocket residues when the amino acid backbone is restrained in the catalytically-competent position. Hydrogen bond distances indicated.

PCA of possible "pocket" residues' molecular weights

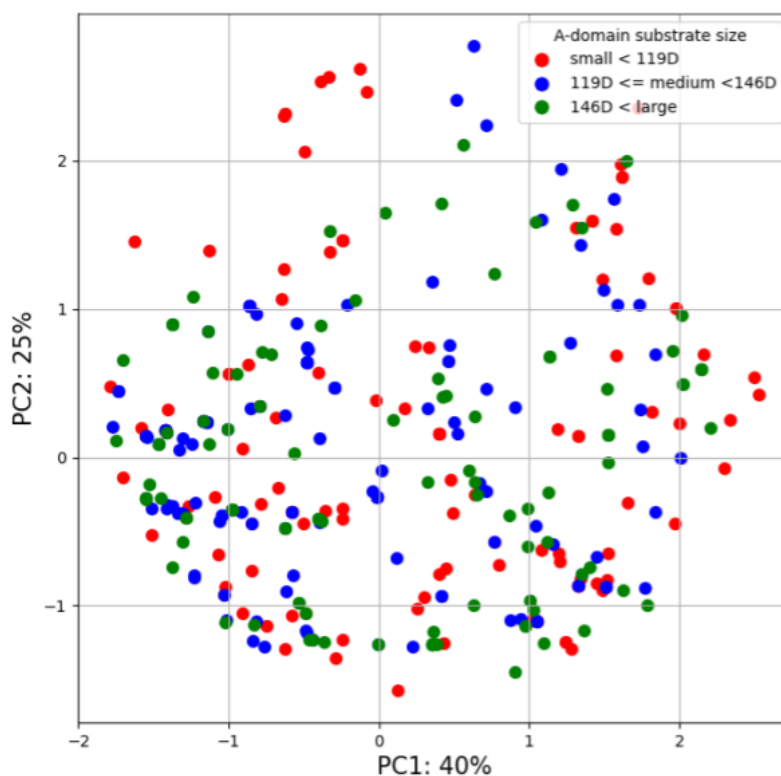

**Supplementary Figure 15. C domains do not appear have an "A domain like" side chain selection pocket for their acceptor substrates.** Principal component analysis of the molecular weight of residues M2917, S2919, Q2921, P2941 and E2950 (possible "pocket") of the C-A linker regions (401 sequences from the MiBiG database), combined with information on the size of the downstream A domain. Principal Component 1 represents 40% of the variation in the dataset and Principal Component 2 represents 25%. If there were some correlation between the "pocket" residues and the substrate, there should have been clustering of same-colored points in the graph. Their absence further supports the results of the correlation analysis conducted with the sum of weights of the "pocket" residues, which indicates no correlation (Spearman's rho: -0.05).



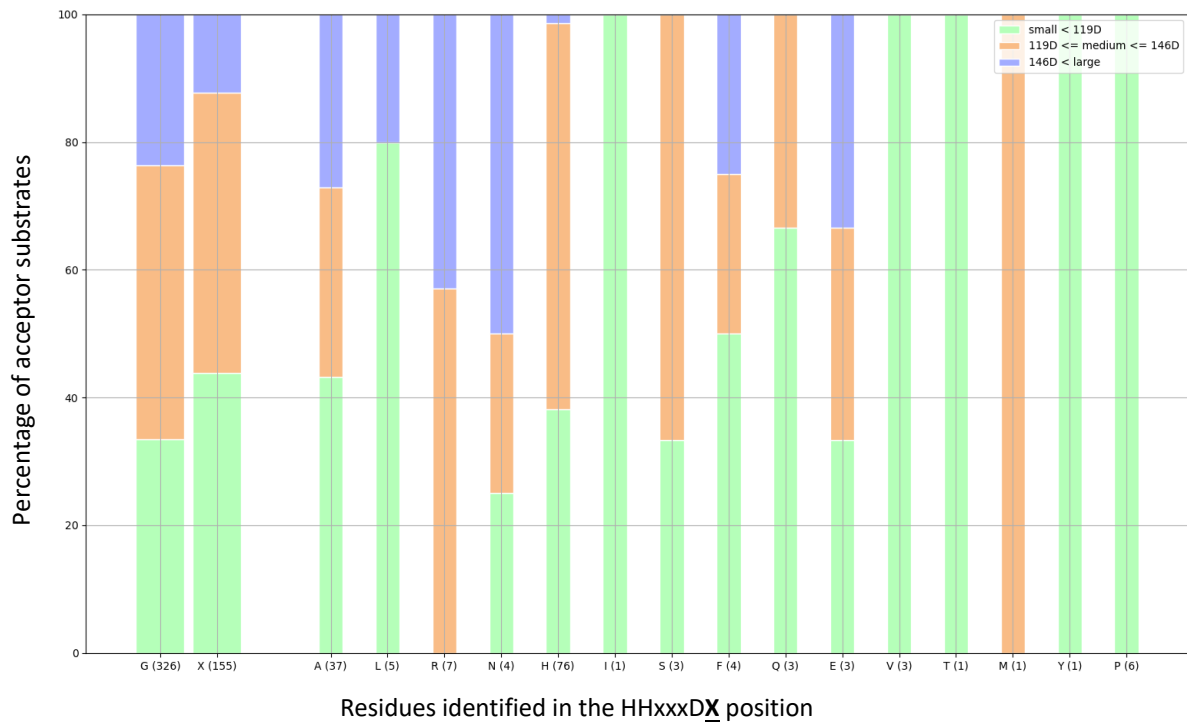

**Supplementary Figure 16. Stacked bar plots of substrate size percentage by mutation in the HHxxxDX motif.** Left hand thicker bars show the acceptor substrates for C domains containing either the canonical HHxxxDG motif or those for a modified HHxxxDX motif. Each bar indicates the proportion of small (green), medium (orange) and large (blue) acceptor substrates for C domains bearing the specific HHxxxDX motif. The thinner bars represent specific residues found in C domains bearing a modified HHxxxDX motif. The numbers in the parentheses show the quantity of sequences taken into account for each case. There is a higher percentage of small acceptor substrates in the modified motifs in total, as well as in most individual cases.

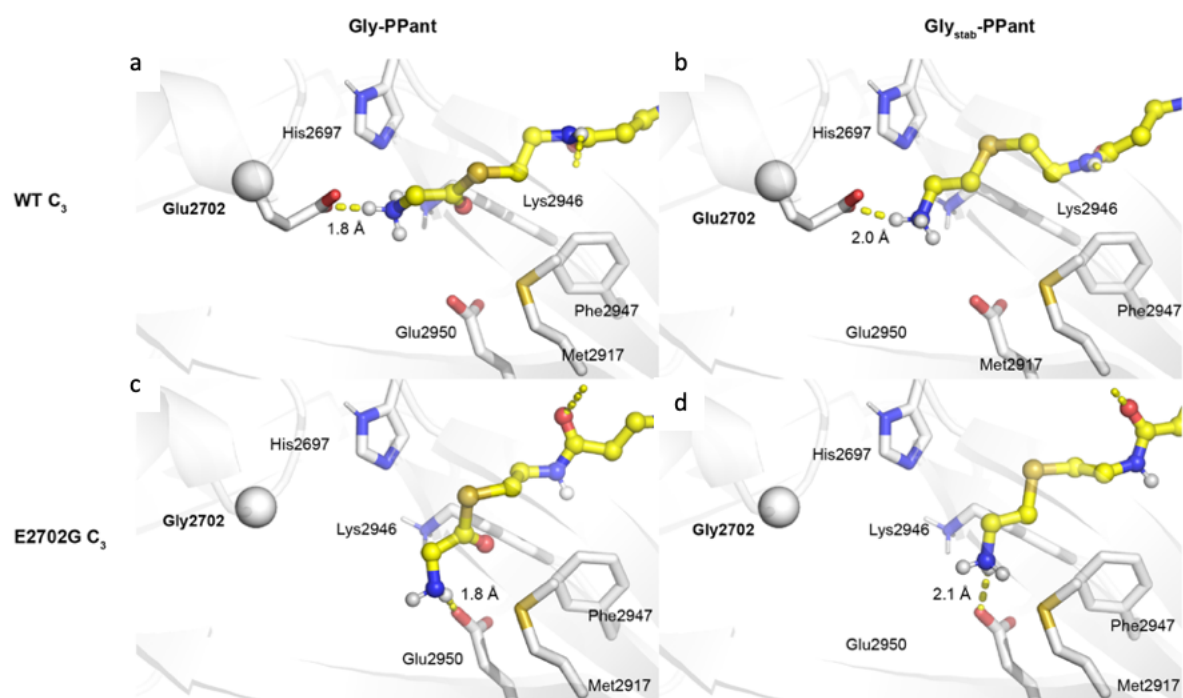

**Supplementary Figure 17. Glycine-PPant and Gly<sub>stab</sub>-PPant computationally docked into WT and E2702G C<sub>3</sub> domains.** Top-scoring computational docking poses of glycine-PPant (left) and Gly<sub>stab</sub>-PPant (right) in WT C<sub>3</sub> domain (top, PDB ID 7KW2) and a model of the E2702G mutant C<sub>3</sub> domain (bottom). Removal of the key Glu2702 residue (to the more common Gly2702) leads to top-scoring poses in which the terminal amine is no longer positioned near the putative catalytic residue, His2697. Hydrogen bond distances indicated.

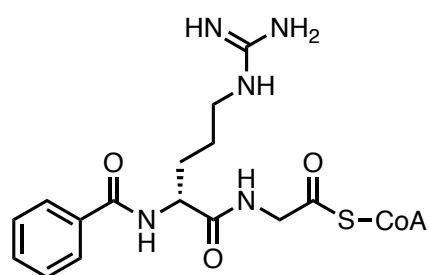

**Supplementary Figure 18. Synthesis and characterization of BA-D-Arg-Gly-CoA.** Synthesized according to the peptidyl-CoA synthesis protocol. <sup>1</sup>H NMR (600 MHz, D<sub>2</sub>O): δ 8.65 (s, 1H), 8.41 (s, 1H), 7.78 – 7.74 (m, 2H), 7.61 – 7.57 (m, 1H), 7.50 – 7.47 (m, 2H), 6.20 (d, *J* = 5.5 Hz, 1H), 4.92 – 4.88 (m, 2H), 4.61 (s, 1H), 4.59 – 4.56 (m, 1H), 4.34 – 4.26 (m, 2H), 4.22 – 4.14 (m, 2H), 3.90 – 3.88 (m, 1H), 3.66 – 3.63 (m, 1H), 3.43 (t, *J* = 6.5 Hz, 2H), 3.34 (t, *J* = 6.0 Hz, 2H), 3.27 (t, *J* = 7.0 Hz, 2H), 3.04 (t, *J* = 6.5 Hz, 2H), 2.40 (t, *J* = 6.5 Hz, 2H), 2.07 – 2.01 (m, 1H), 1.98 – 1.90 (m, 1H), 1.83 – 1.72 (m, 2H), 0.96 (s, 3H), 0.84 (s, 3H); HRMS (ESI): calculated for C<sub>36</sub>H<sub>56</sub>N<sub>12</sub>O<sub>19</sub>P<sub>3</sub>S<sup>2+</sup> [M+H]<sup>2+</sup>: 543.1393, found: 543.1399 (Δ 0.3 ppm).

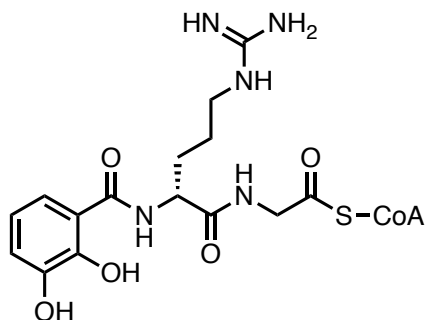

**Supplementary Figure 19. Synthesis and characterization of**

**DHB-D-Arg-Gly-CoA.** Synthesized according to the peptidyl-

CoA synthesis protocol.  $^1\text{H}$  NMR (400 MHz,  $D_2O$ ):  $\delta$  8.37 (s, 1H), 8.05 (s, 1H), 7.12 – 7.08 (m, 1H), 6.90 – 6.85 (m, 1H), 6.68 – 6.64 (s, 1H), 6.02 – 5.98 (m, 1H), 4.79 – 4.75 (m, 1H), 4.66 – 4.64 (m, 1H), 4.49 – 4.43 (m, 2H), 4.15 – 4.08 (m, 3H), 3.90 (s, 1H), 3.29 – 3.24 (m, 1H), 3.15 – 3.13 (m, 1H), 2.96 – 2.93 (s, 2H), 2.27 – 2.25 (m, 1H), 1.96 (s, 1H), 0.78 (s, 3H), 0.64 (s, 3H); HRMS

(ESI): calculated for  $C_{36}H_{56}N_{12}O_{21}P_3S^+$   $[M+H]^+$ : 1117.2611, found: 1117.26111 ( $\Delta$  0.1 ppm).

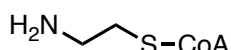

**Supplementary Figure 20. Synthesis and characterization of Gly<sub>stab</sub>-CoA.**

Synthesized according to the modified aminoacyl-CoA synthesis protocol.  $^1\text{H}$  NMR (600 MHz,  $D_2O$ ):  $\delta$  8.66 (s, 1H), 8.43 – 8.40 (m, 1H), 6.25 (d,  $J$  = 6.0 Hz, 1H), 4.93 – 4.86 (m, 2H), 4.66 – 4.63 (m, 1H), 4.34 – 4.25 (m, 2H), 4.08 – 4.05 (m, 1H), 3.93 – 3.91 (m, 1H), 3.90 – 3.86 (m, 1H), 3.65 – 3.61 (m, 1H), 3.55 – 3.51 (m, 3H), 3.50 – 3.45 (m, 1H), 3.42 – 3.39 (m, 1H), 3.38 – 3.35 (m, 1H), 3.28 – 3.24 (m, 1H), 2.92 – 2.88 (m, 1H), 2.87 – 2.81 (m, 1H), 2.54 – 2.50 (m, 2H), 0.97 – 0.94 (m, 3H), 0.85 – 0.82 (m, 3H); HRMS (ESI): calculated for  $C_{23}H_{42}N_8O_{16}P_3S^+$   $[M+H]^+$ : 811.1647, found: 811.1650 ( $\Delta$  0.3 ppm).

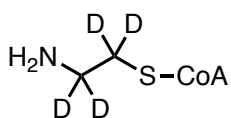

**Supplementary Figure 21. Synthesis and characterization of  $d_4$ -Gly<sub>stab</sub>-CoA.**

Synthesized according to the modified aminoacyl-CoA synthesis protocol.  $^1\text{H}$  NMR (600 MHz,  $D_2O$ ):  $\delta$  8.58 – 8.55 (m, 1H), 8.48 – 8.44 (m, 1H), 8.30 – 8.27 (m, 1H), 6.20 – 6.19 (m, 1H), 4.88 – 4.84 (m, 2H), 4.59 (s, 2H), 4.25 (s, 2H), 4.05 – 4.02 (m, 1H), 3.85 – 3.80 (m, 2H), 3.59 – 3.55 (m, 2H), 3.39 – 3.34 (m, 3H), 2.69 (t,  $J$  = 7.0 Hz, 2H), 2.47 (t,  $J$  = 6.5 Hz, 2H), 0.90 (s, 3H), 0.79 (s, 3H); HRMS (ESI): calculated for  $C_{23}H_{37}D_4N_8O_{16}P_3S^+$   $[M+H]^+$ : 815.1898, found: 815.1896 ( $\Delta$  0.2 ppm).

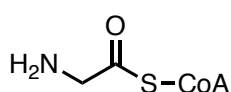

**Supplementary Figure 22. Synthesis and characterization of Gly-CoA.**

Synthesized according to the aminoacyl-CoA synthesis protocol.  $^1\text{H}$  NMR (600 MHz,  $D_2O$ ):  $\delta$  8.70 (s, 1H), 8.47 (s, 1H), 6.28 – 5.24 (m, 1H), 4.93 – 4.88 (m, 2H), 4.63 (s, 1H), 4.3 – 4.2 (m, 2H), 4.19 (s, 2H), 4.06 (m, 1H), 3.88 (dd,  $J$  = 9.5, 4.5 Hz, 1H), 3.65 (dd,  $J$  = 9.5, 4.5 Hz, 1H), 3.54 – 3.47 (m, 2H), 3.44 (t,  $J$  = 6.5 Hz, 2H), 3.19 (t,  $J$  = 6.0 Hz, 2H), 2.48 (t,  $J$  = 6.5 Hz, 2H), 0.97 (s, 3H), 0.87 (s, 3H); HRMS (ESI): calculated for  $C_{23}H_{40}N_8O_{17}P_3S^+$   $[M+H]^+$ : 825.1439, found: 825.14537 ( $\Delta$  1.7 ppm).

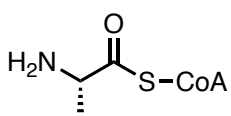

**Supplementary Figure 23. Synthesis and characterization of Ala-CoA.**

Synthesized according to the aminoacyl-CoA synthesis protocol.  $^1\text{H}$  NMR (600 MHz,  $D_2O$ ):  $\delta$  8.70 (s, 1H), 8.65 (s, 1H), 8.47 (s, 1H), 6.27 – 6.23 (m, 1H),

5.19 – 5.14 (m, 1H), 4.94 – 4.89 (m, 2H), 4.65 – 4.62 (m, 1H), 4.39 (q,  $J = 7.0$  Hz, 1H), 4.07 – 4.05 (m, 1H), 3.90 – 3.86 (m, 1H), 3.67 – 3.61 (m, 1H), 3.55 – 3.46 (m, 2H), 3.43 (t,  $J = 6.5$  Hz, 2H), 3.24 – 3.12 (m, 2H), 2.48 (t,  $J = 6.5$  Hz, 2H), 1.62 (d,  $J = 7.0$  Hz, 3H), 0.97 (s, 3H), 0.87 (s, 3H); HRMS (ESI): calculated for  $C_{24}H_{42}N_8O_{17}P_3S^+$  [M-H]: 837.1450, found: 837.14505 ( $\Delta$  0.6 ppm).

L-Phe- and L-Leu-CoA were synthesized as previously reported; spectra were identical to those reported.<sup>19,20</sup>

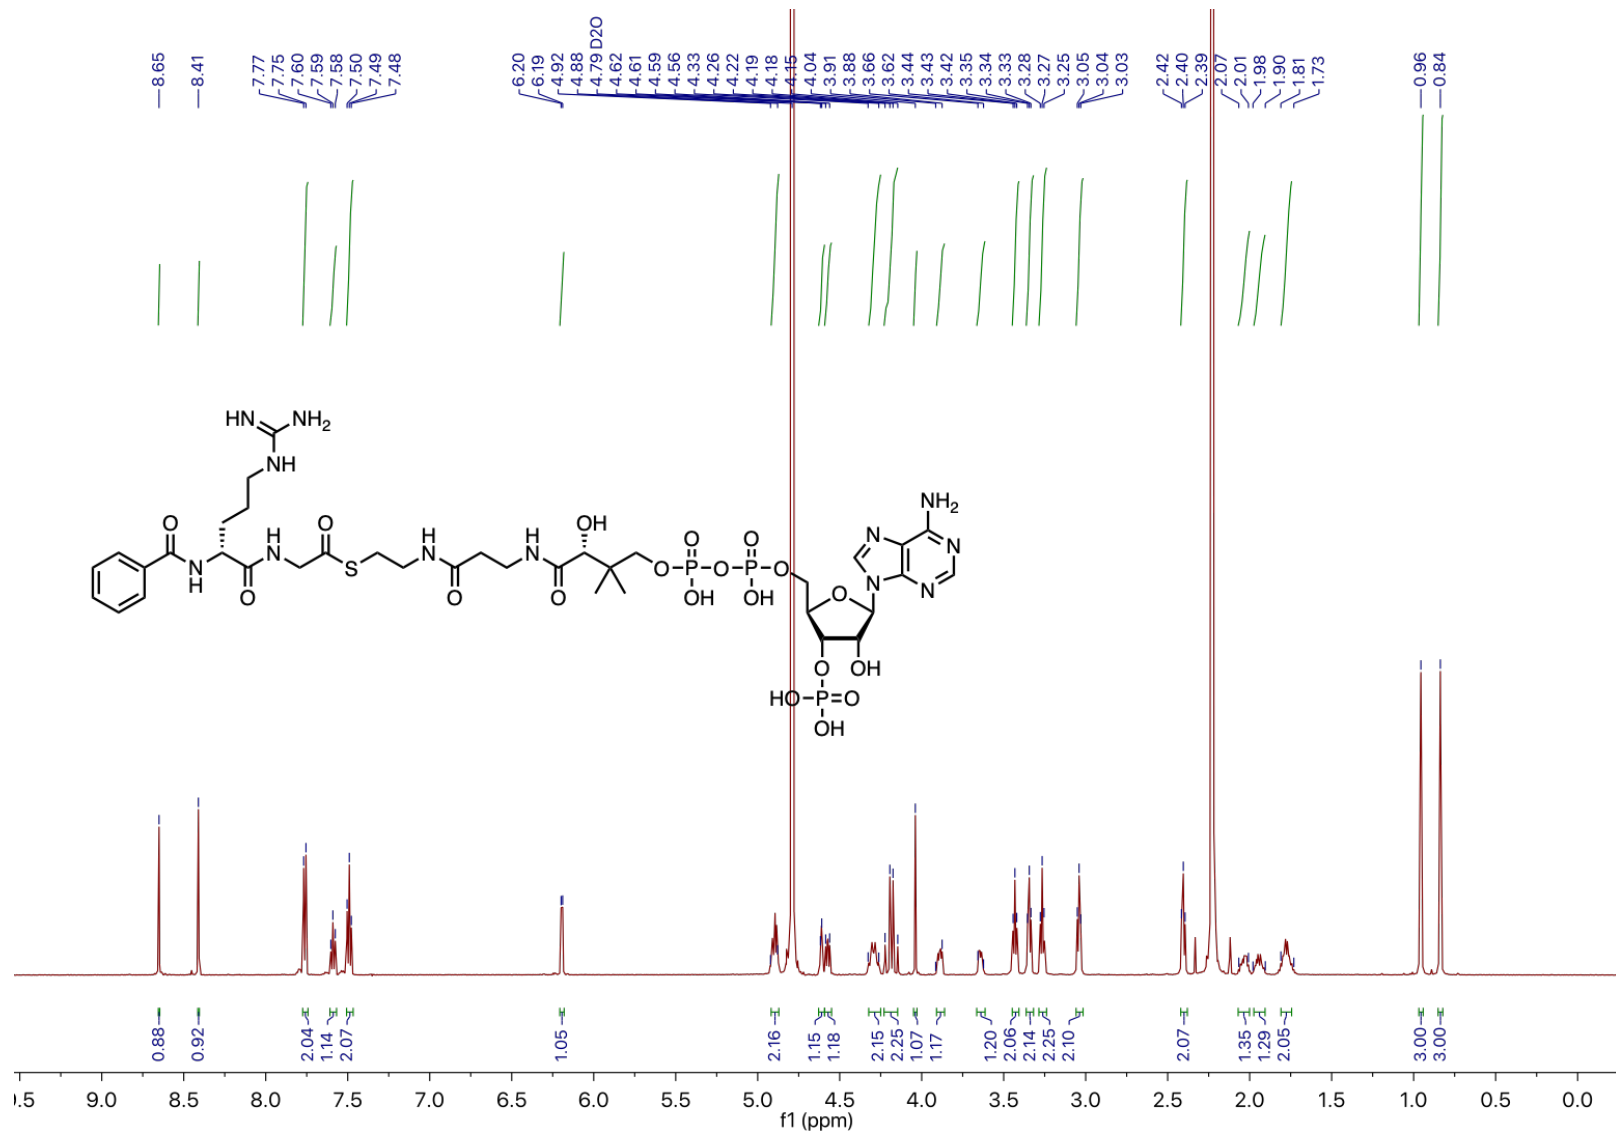

Supplementary Figure 24. <sup>1</sup>H NMR spectrum of BA-D-Arg-Gly CoA.

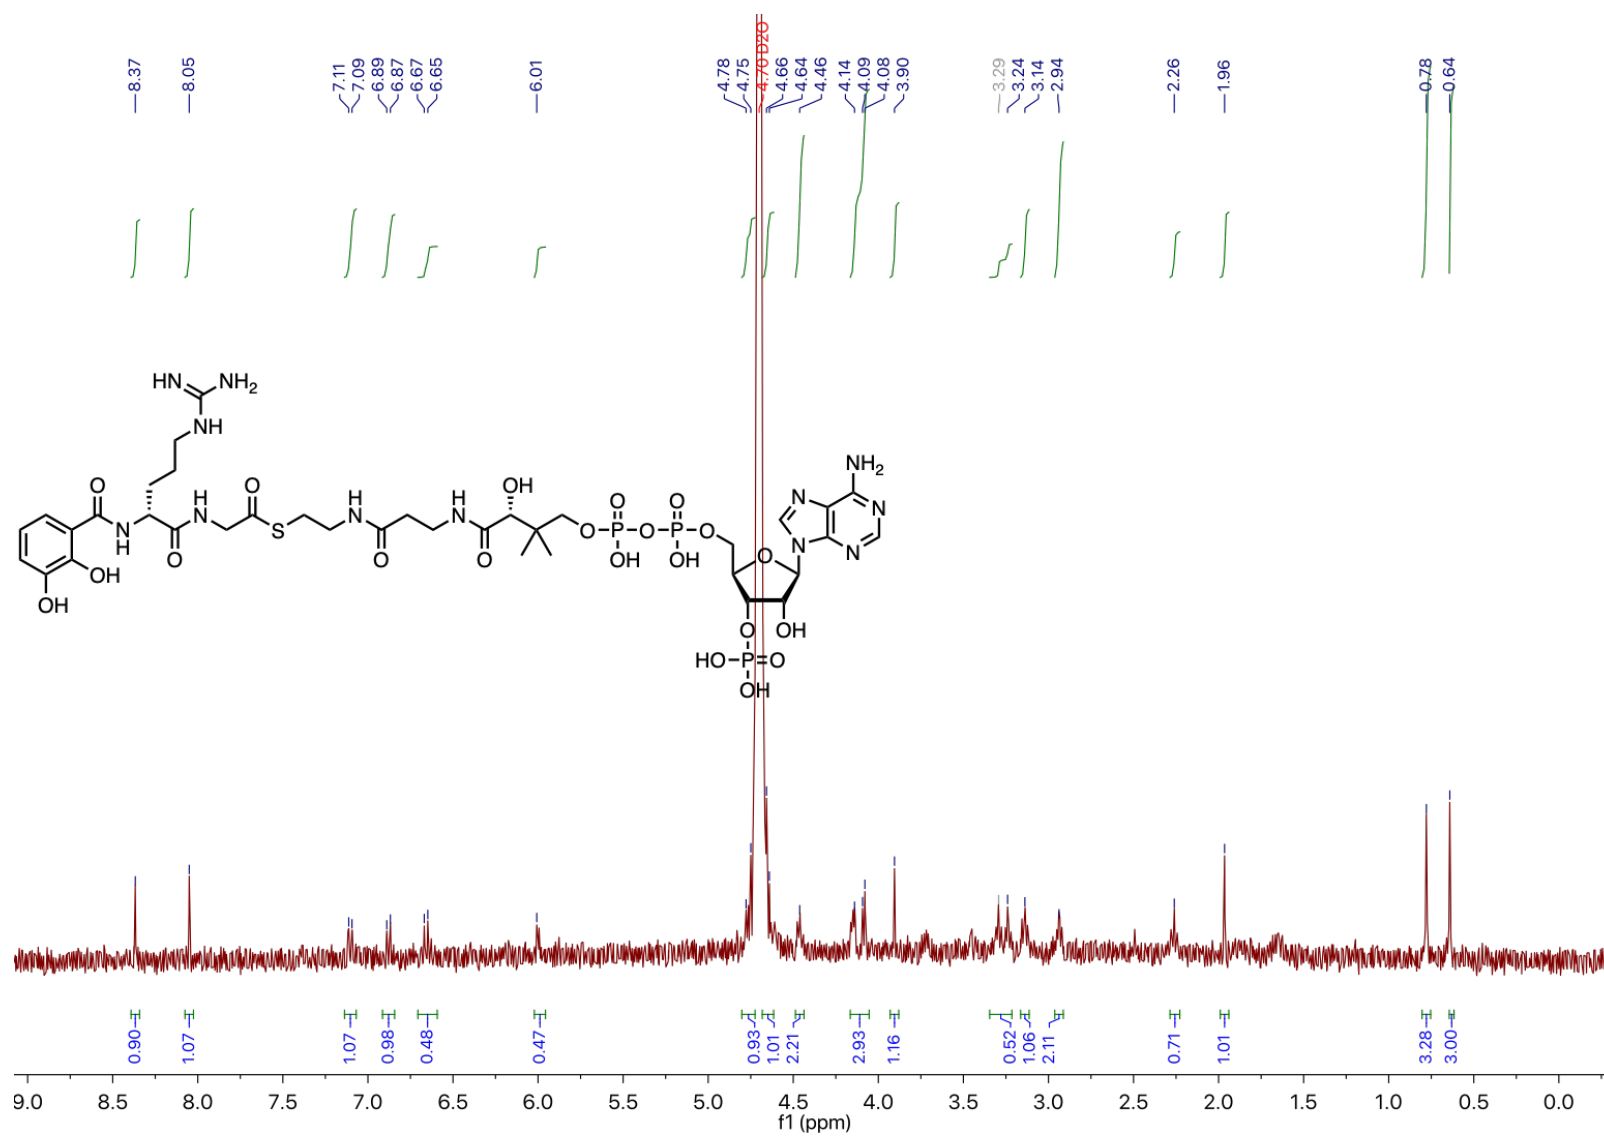

Supplementary Figure 25. <sup>1</sup>H NMR spectrum of DHB-D-Arg-Gly CoA.

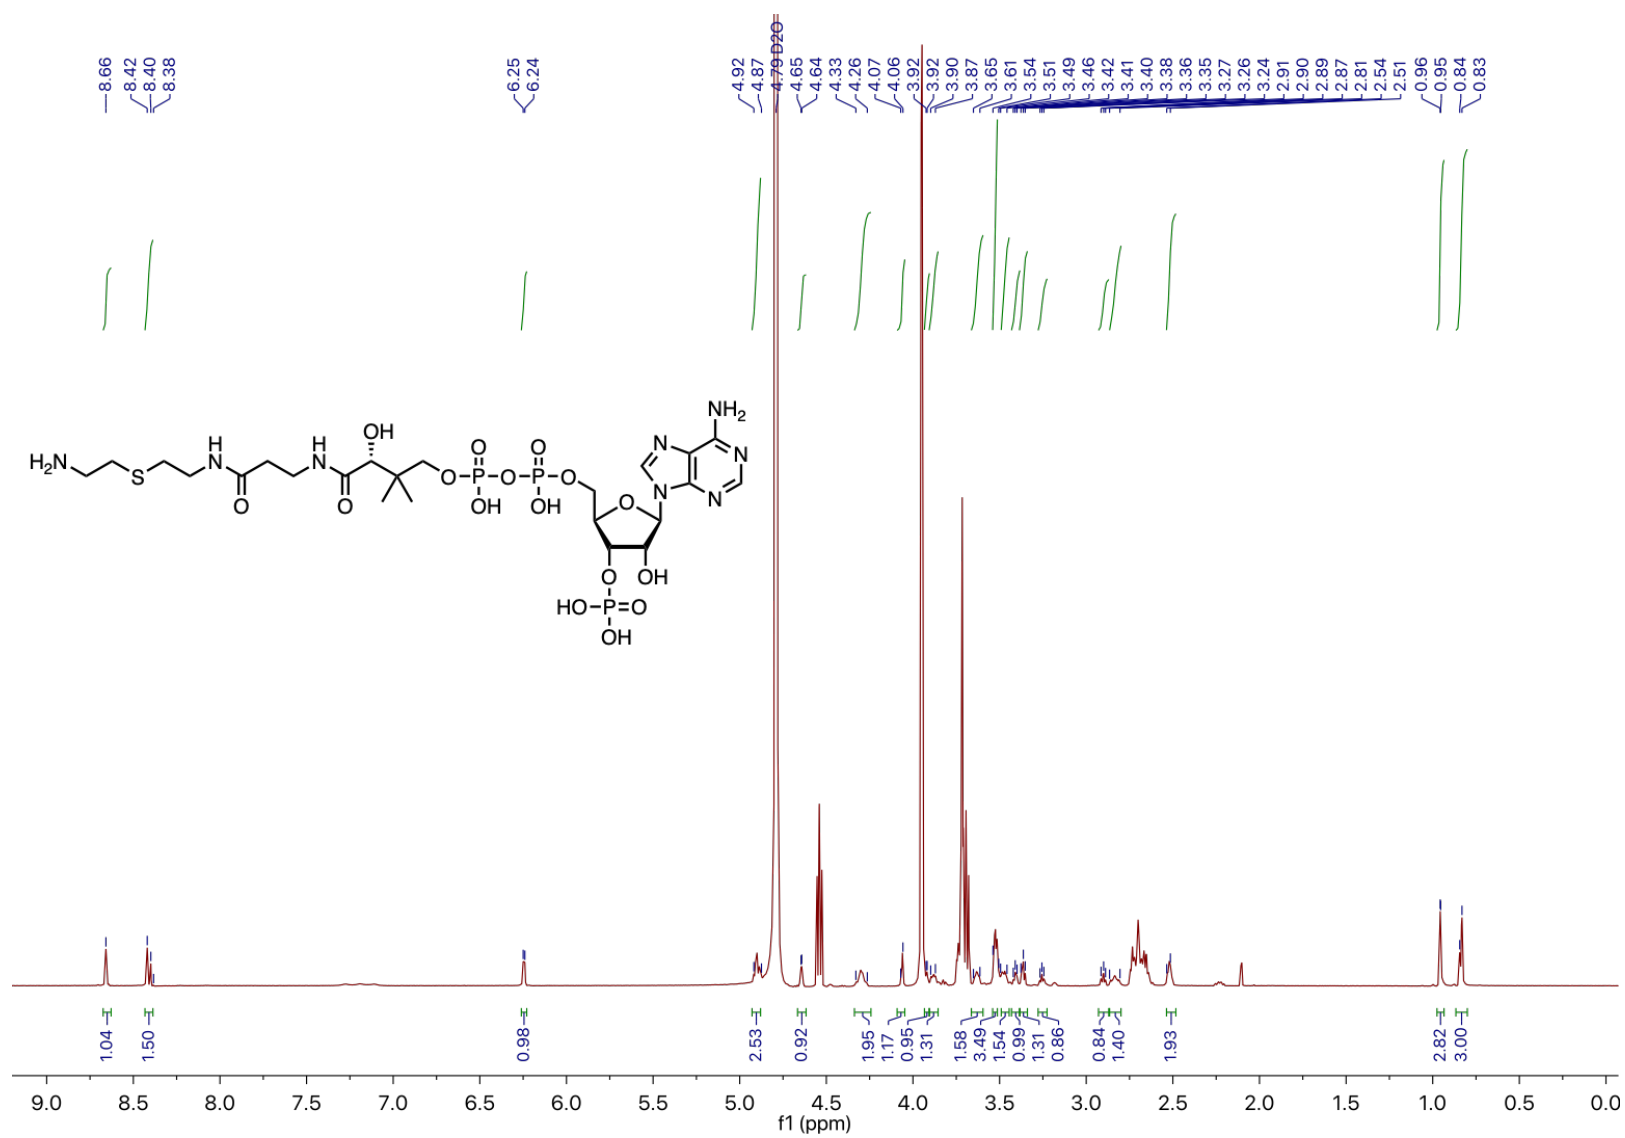

Supplementary Figure 26. <sup>1</sup>H NMR spectrum of Gly<sub>stab</sub>-CoA.

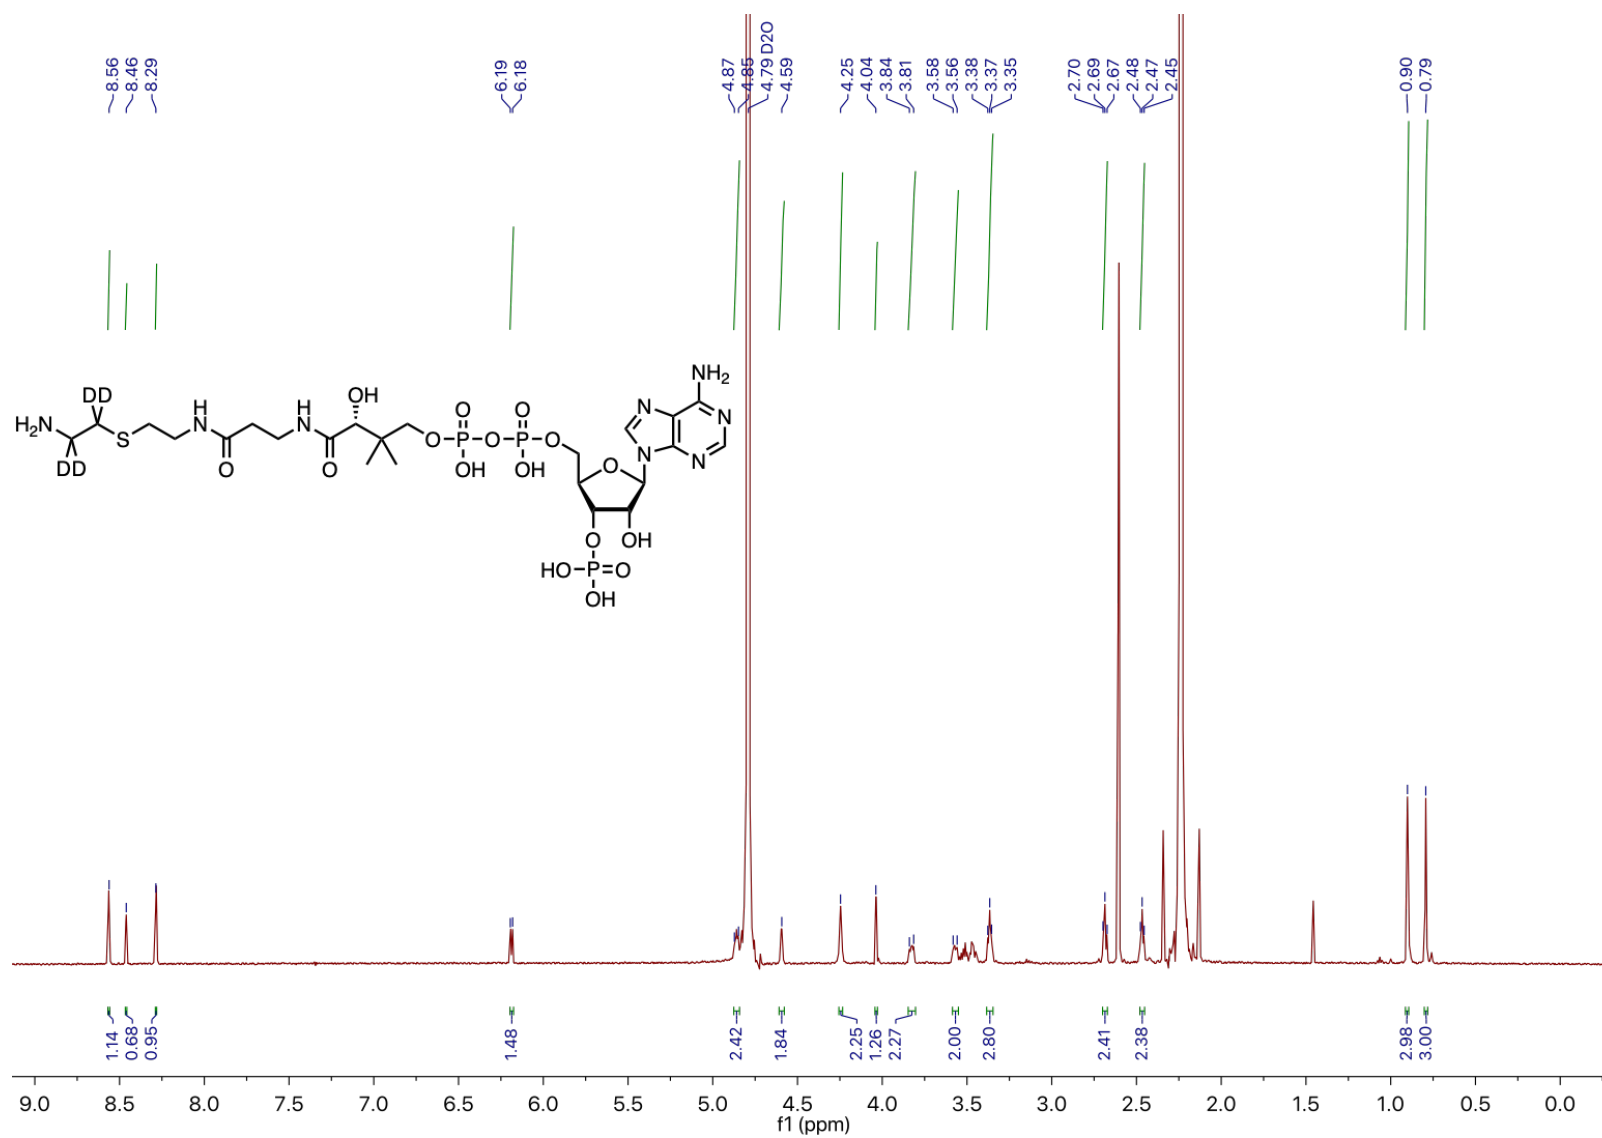

Supplementary Figure 27.  $^1\text{H}$  NMR spectrum of  $d_4$ -Glystab-CoA.



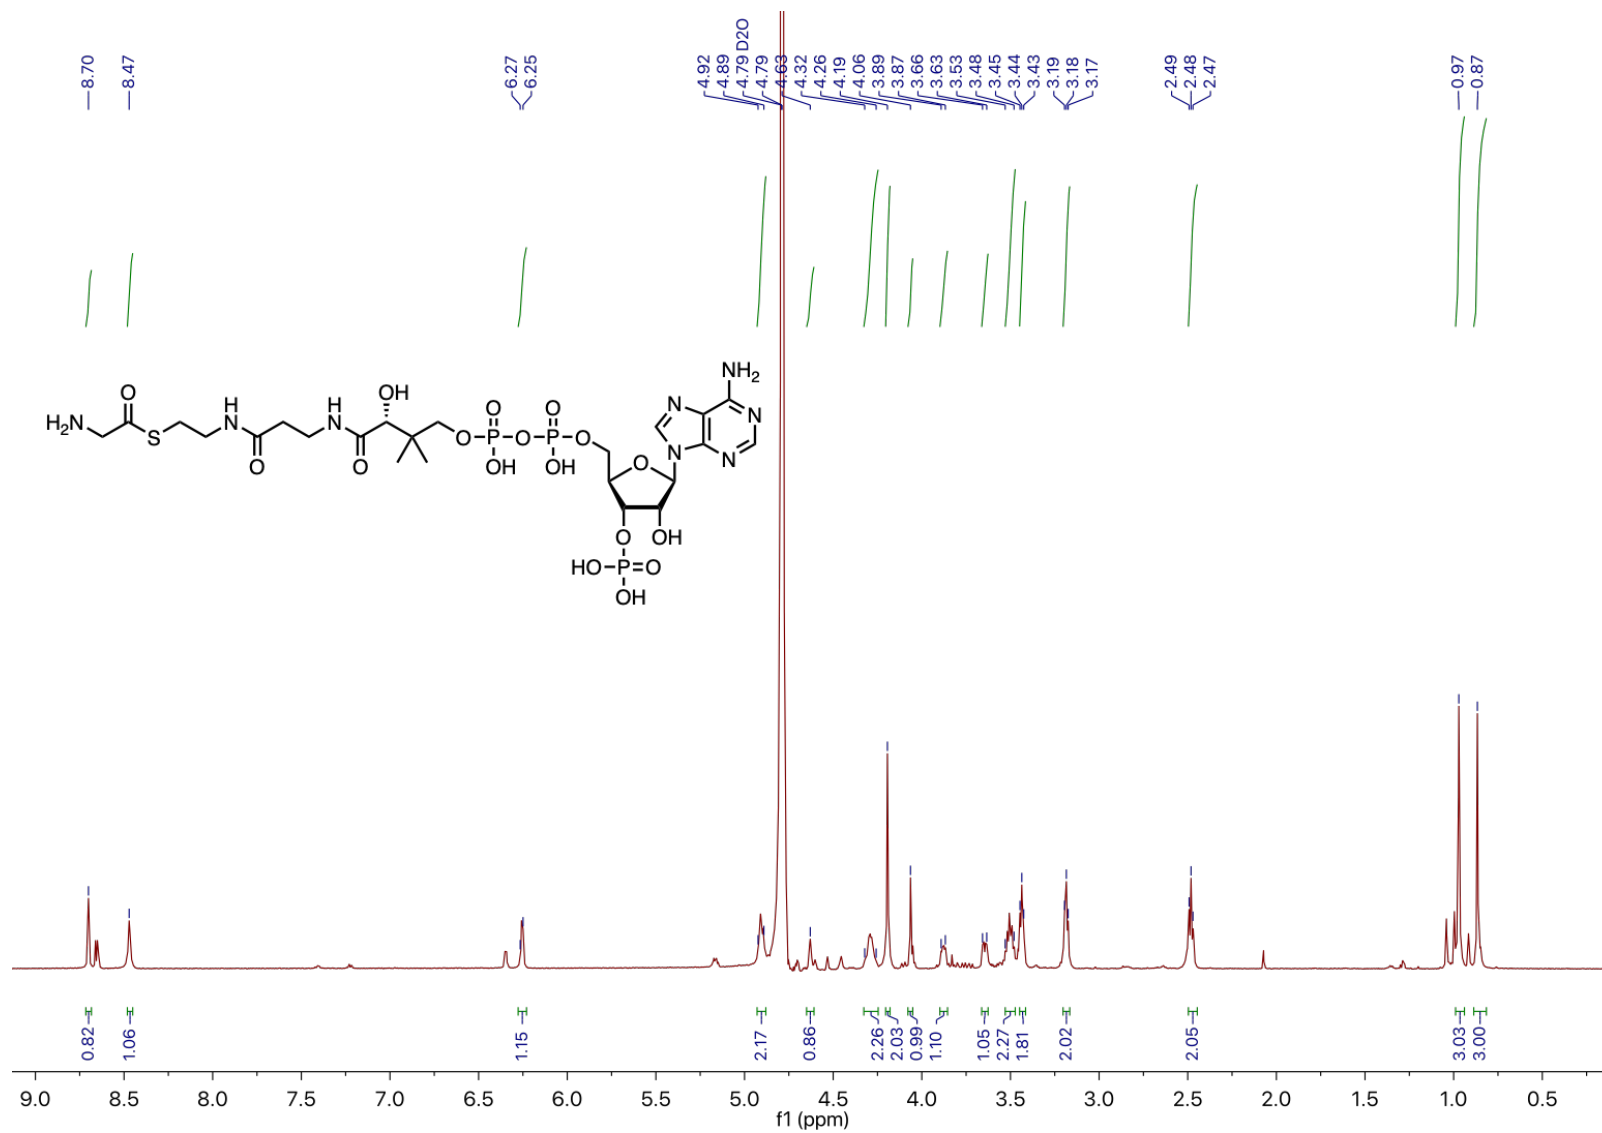

Supplementary Figure 28. <sup>1</sup>H NMR spectrum of Gly-CoA.

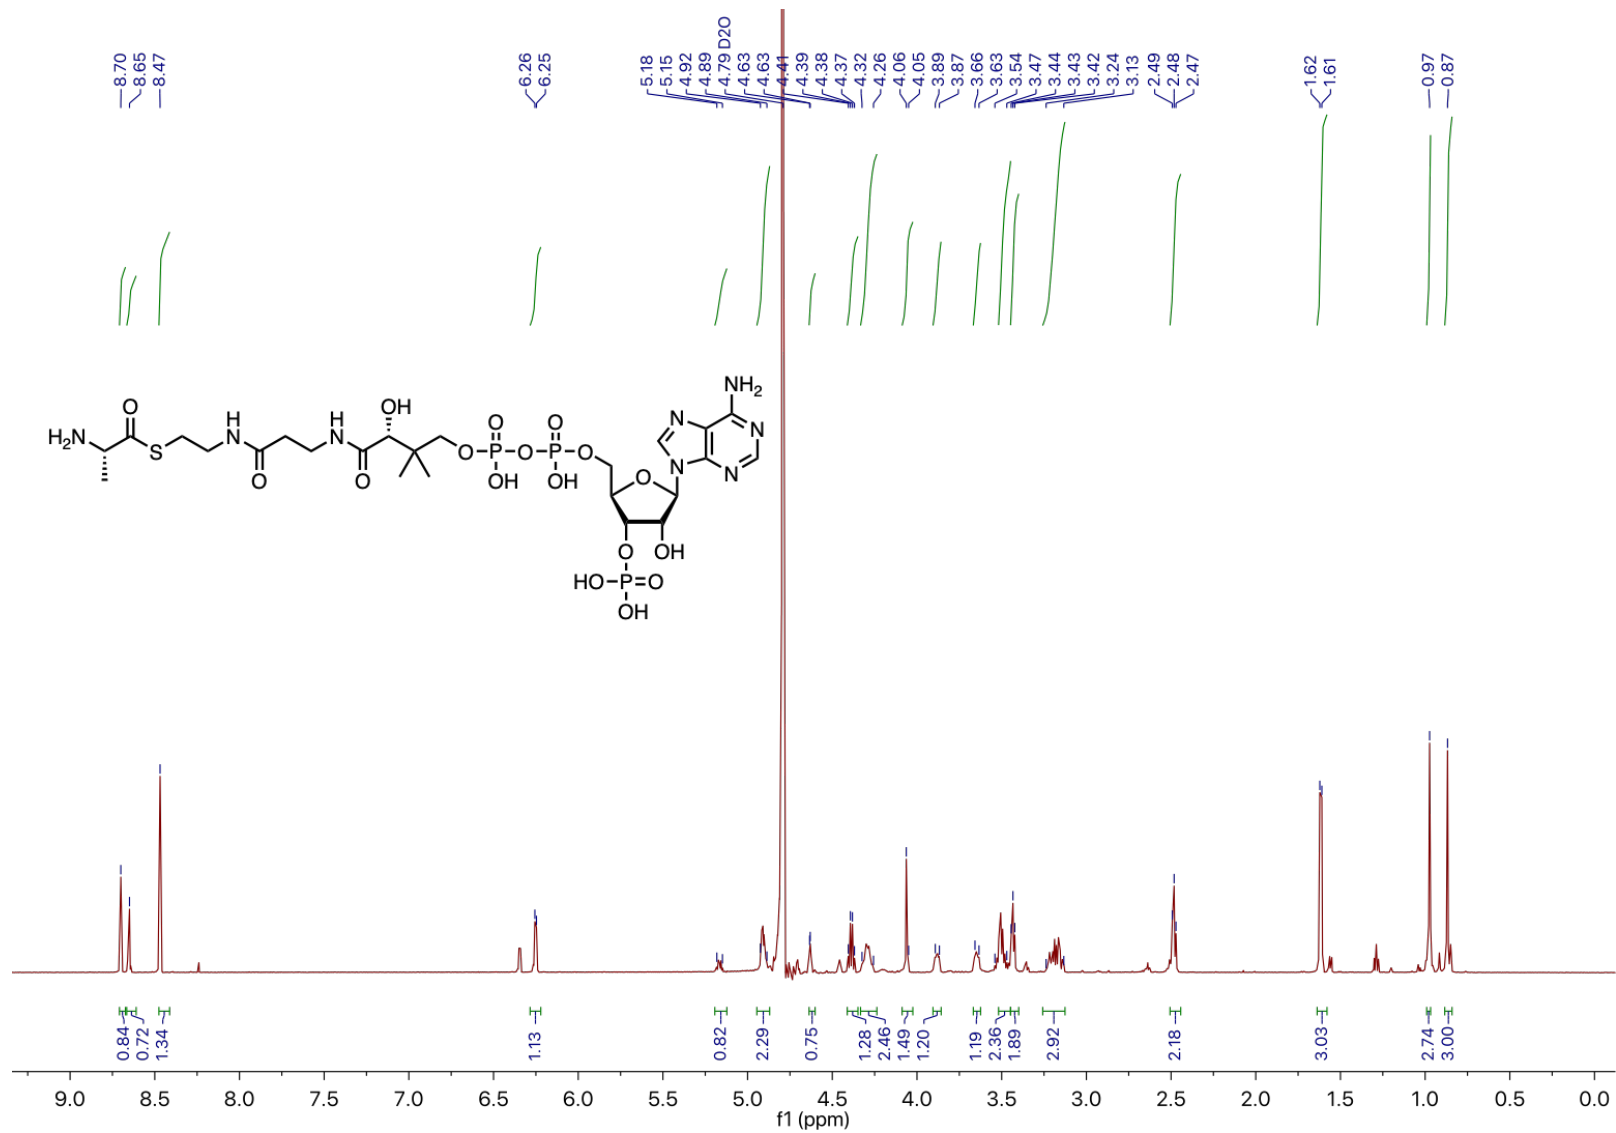

Supplementary Figure 29. <sup>1</sup>H NMR spectrum of Ala-CoA.

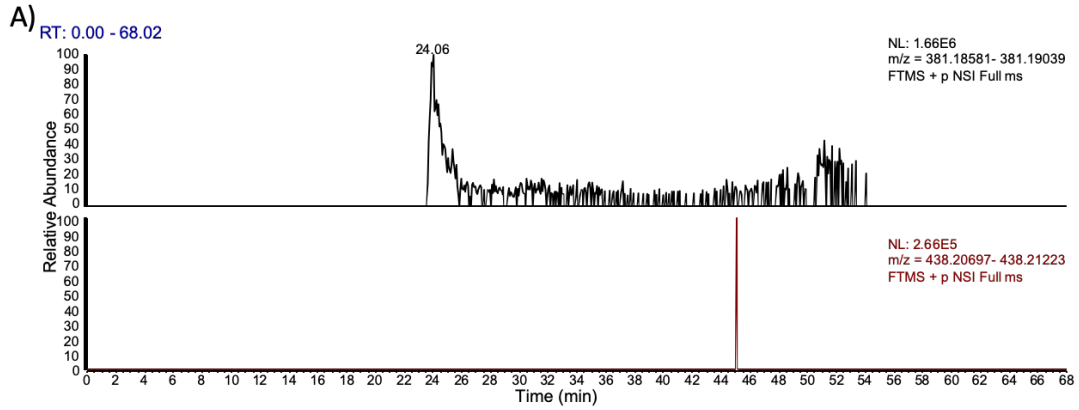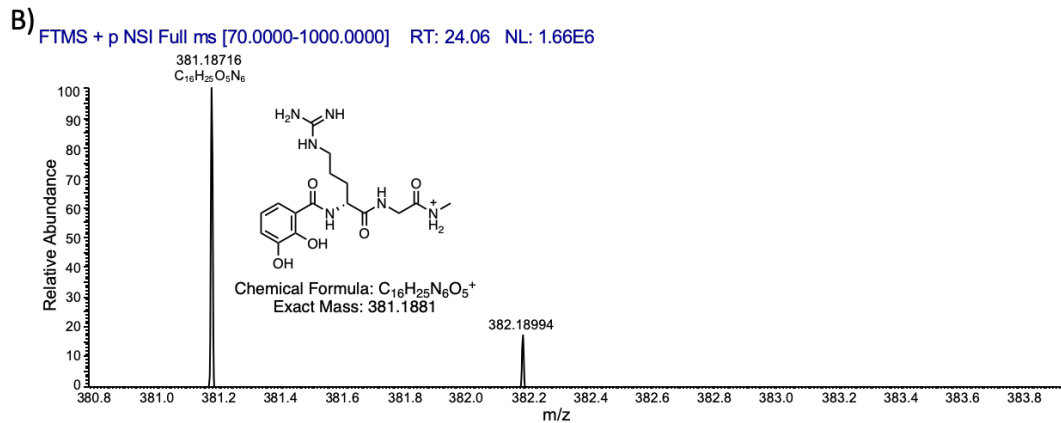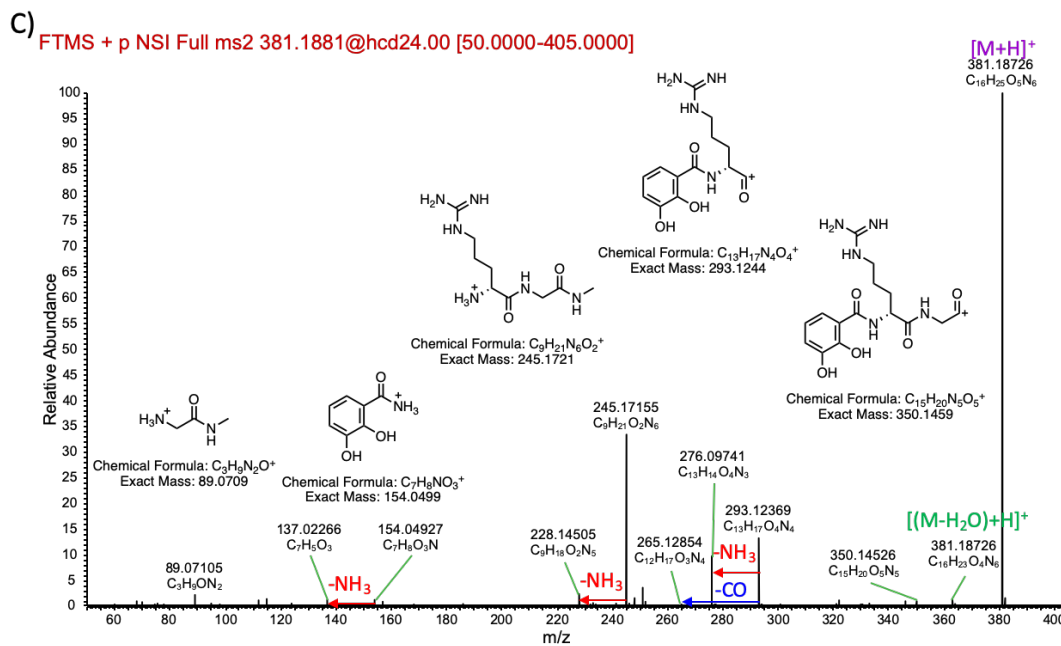

**Supplementary Figure 30. LC-HRMS analyses for reconstitution of PCP<sub>2</sub>-C<sub>3</sub>::PCP<sub>3</sub> WT without SpyCatcher and SpyTag.** Experiments utilized DHB-D-Arg-Gly as the donor substrate and Gly as the acceptor substrate. A) Extracted ion chromatograms for masses corresponding to the donor tripeptide (upper) and product tetrapeptide (lower) (Orbitrap Fusion, [M+H]<sup>+</sup>). B) Accurate mass and isotopic distribution of DHB-D-Arg-Gly donor. C) MS<sup>2</sup> fragmentation for DHB-D-Arg-Gly donor.

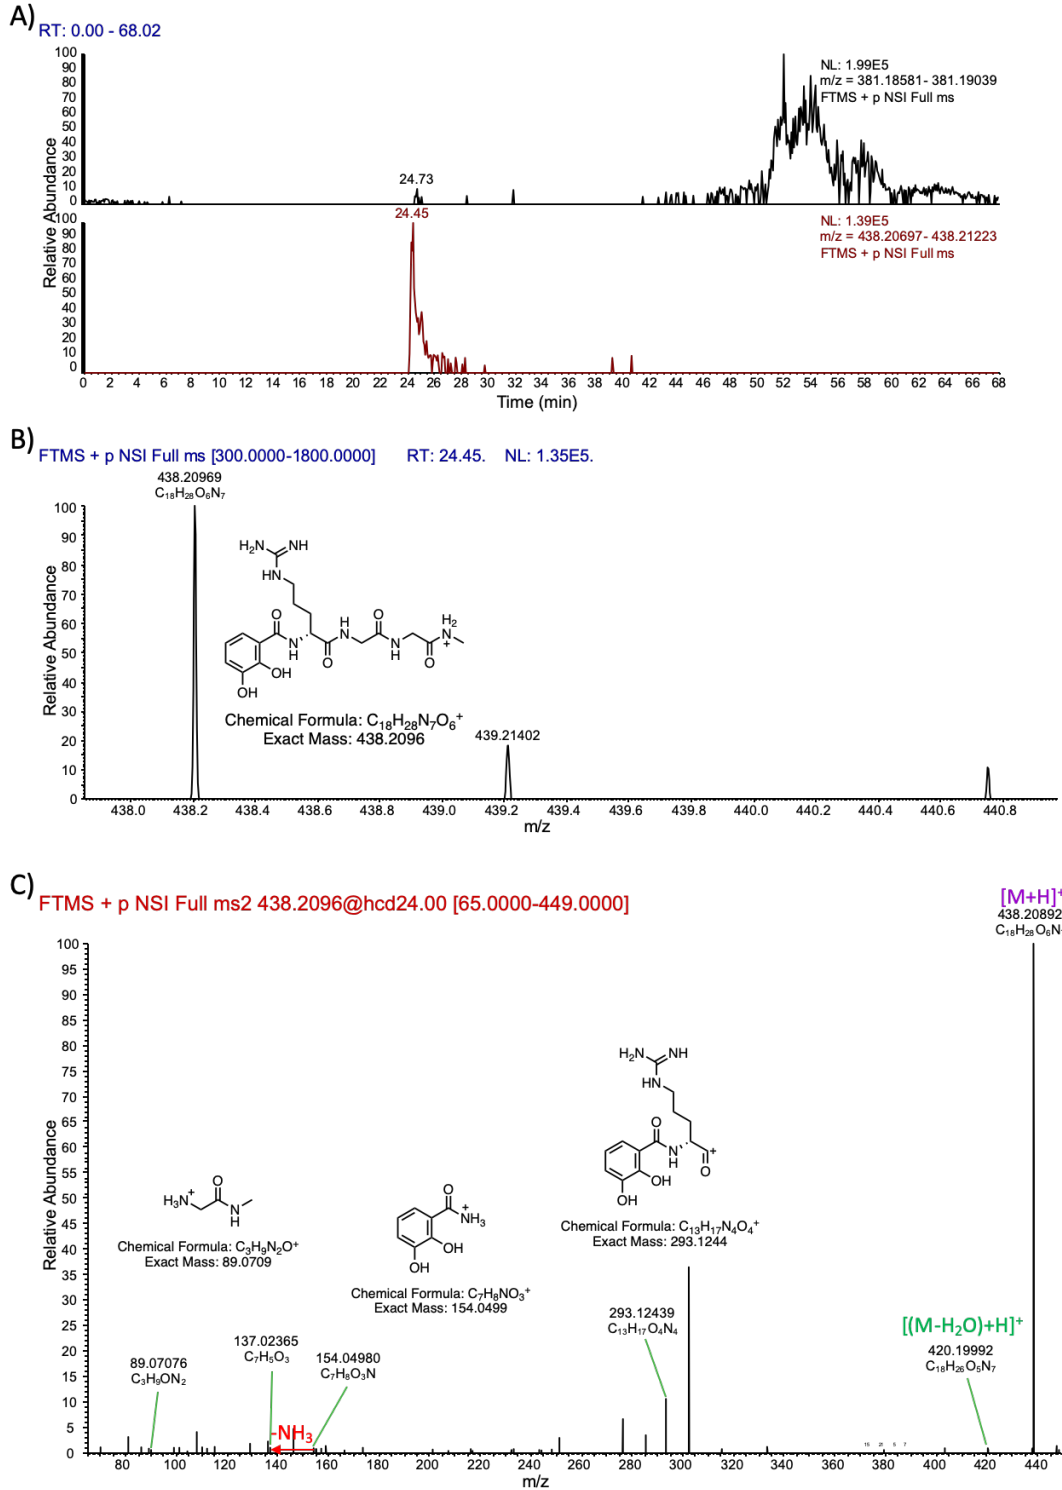

**Supplementary Figure 31. LC-HRMS analyses for reconstitution of PCP<sub>2</sub>-C<sub>3</sub>::PCP<sub>3</sub> WT using SpyCatcher and SpyTag.** Experiments utilized DHB-D-Arg-Gly as the donor substrate and Gly as the acceptor substrate. A) Extracted ion chromatograms for masses corresponding to the donor tripeptide (upper) and product tetrapeptide (lower) (Orbitrap Fusion, [M+H]<sup>+</sup>). B) Accurate mass and isotopic distribution of DHB-D-Arg-Gly-Gly product. C) MS<sup>2</sup> fragmentation for DHB-D-Arg-Gly-Gly product.

A) RT: 0.00 - 68.00

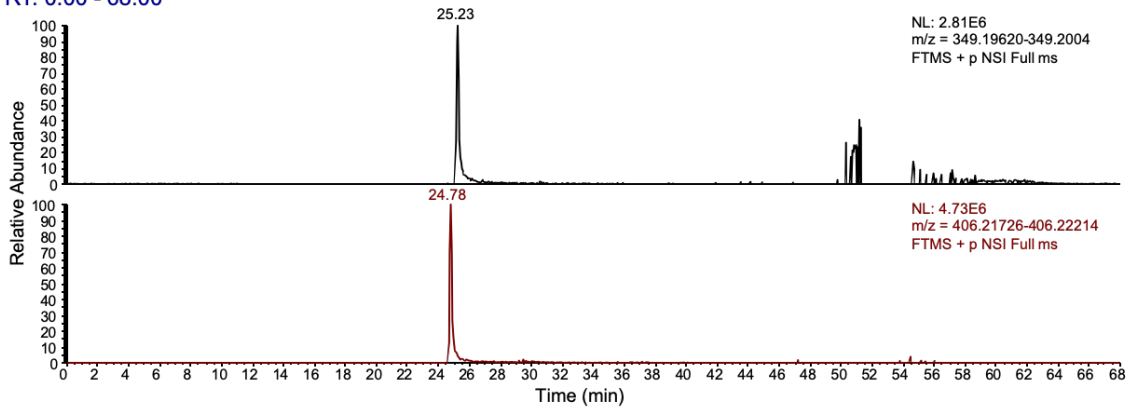

B) FTMS + p NSI Full ms [300.0000-1000.0000] RT: 25.23 NL: 2.74E6

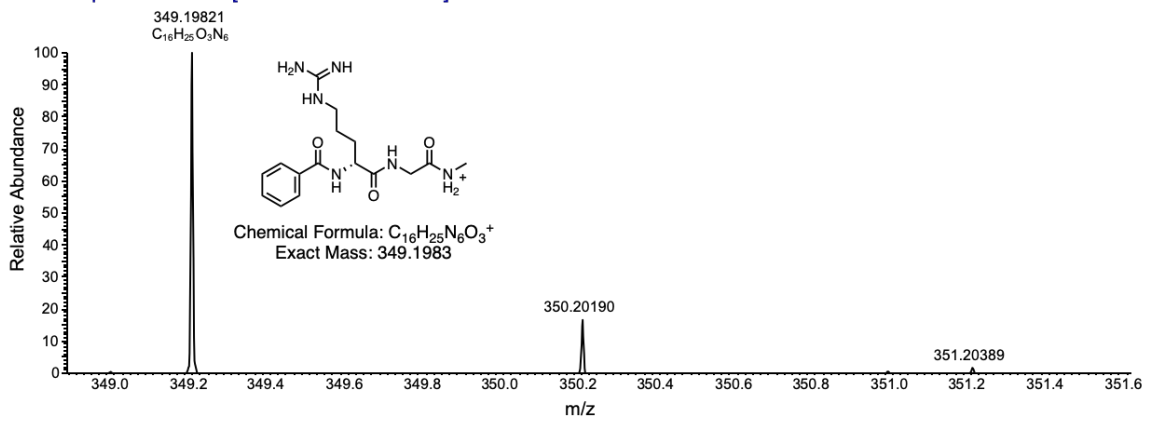

C) FTMS + p NSI Full ms2 349.1983@hcd24.00 [50.0000-375.0000]

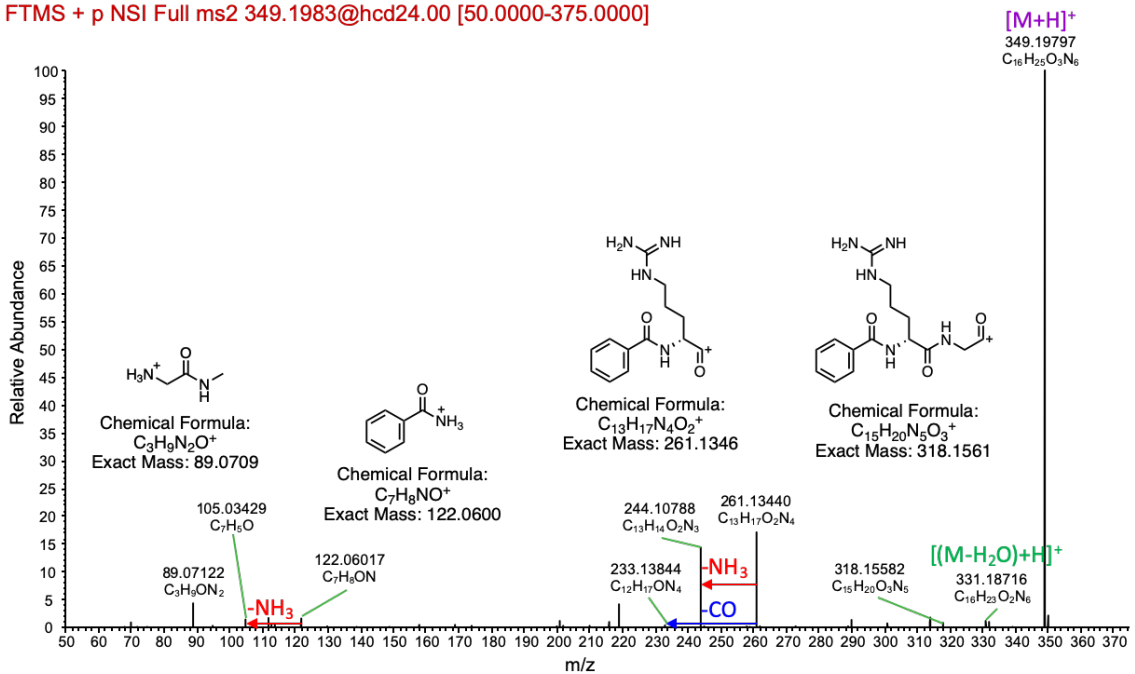

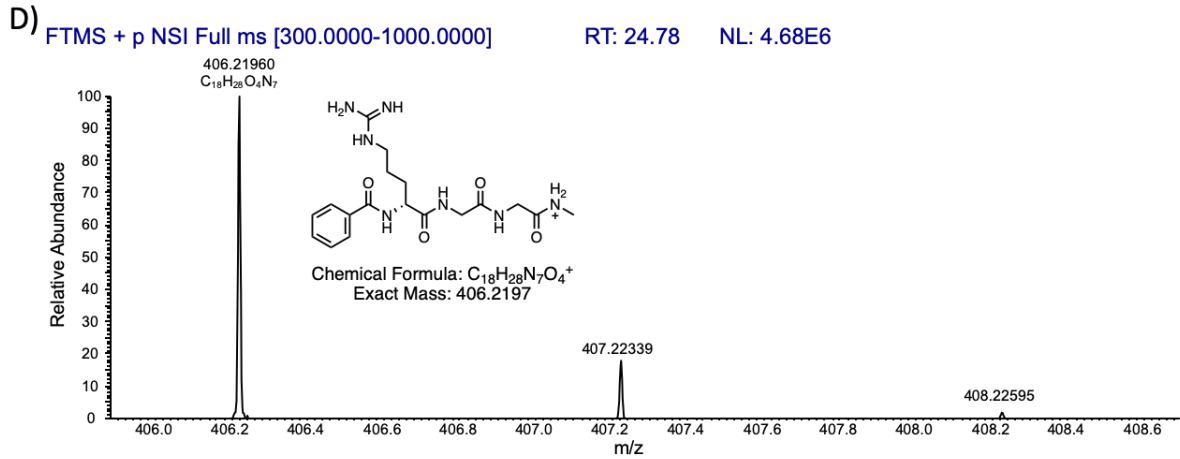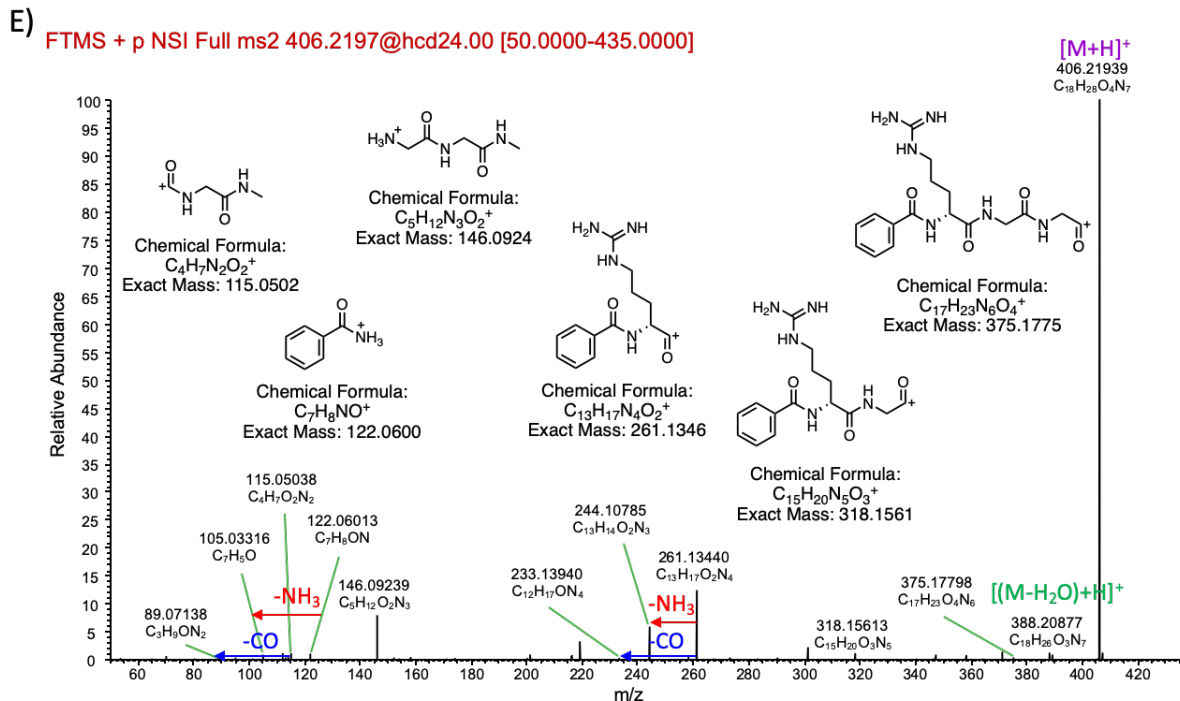

**Supplementary Figure 32. LC-HRMS analyses for reconstitution of PCP<sub>2</sub>-C<sub>3</sub>::PCP<sub>3</sub> WT using SpyCatcher and SpyTag.** Experiments utilized BA-D-Arg-Gly as the donor substrate and Gly as the acceptor substrate. A) Extracted ion chromatograms for masses corresponding to the donor tripeptide (upper) and product tetrapeptide (lower) (Orbitrap Fusion, [M+H]<sup>+</sup>). B) Accurate mass and isotopic distribution of BA-D-Arg-Gly donor. C) MS<sup>2</sup> fragmentation for BA-D-Arg-Gly donor. D) Accurate mass and isotopic distribution of BA-D-Arg-Gly-Gly product. E) MS<sup>2</sup> fragmentation for BA-D-Arg-Gly-Gly product.

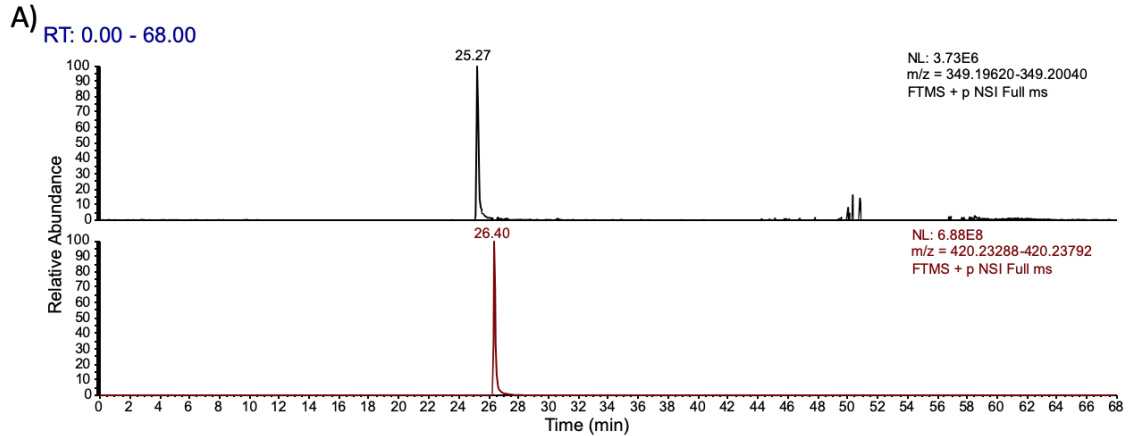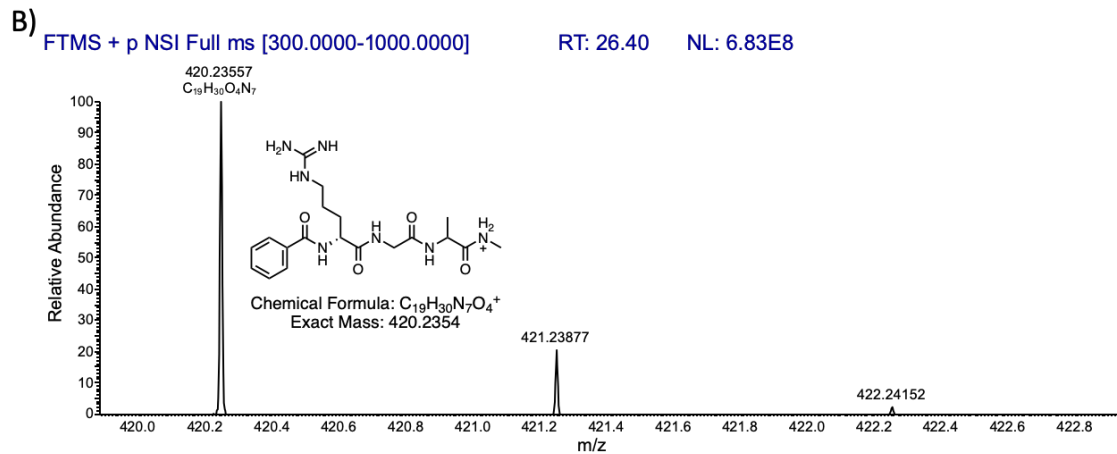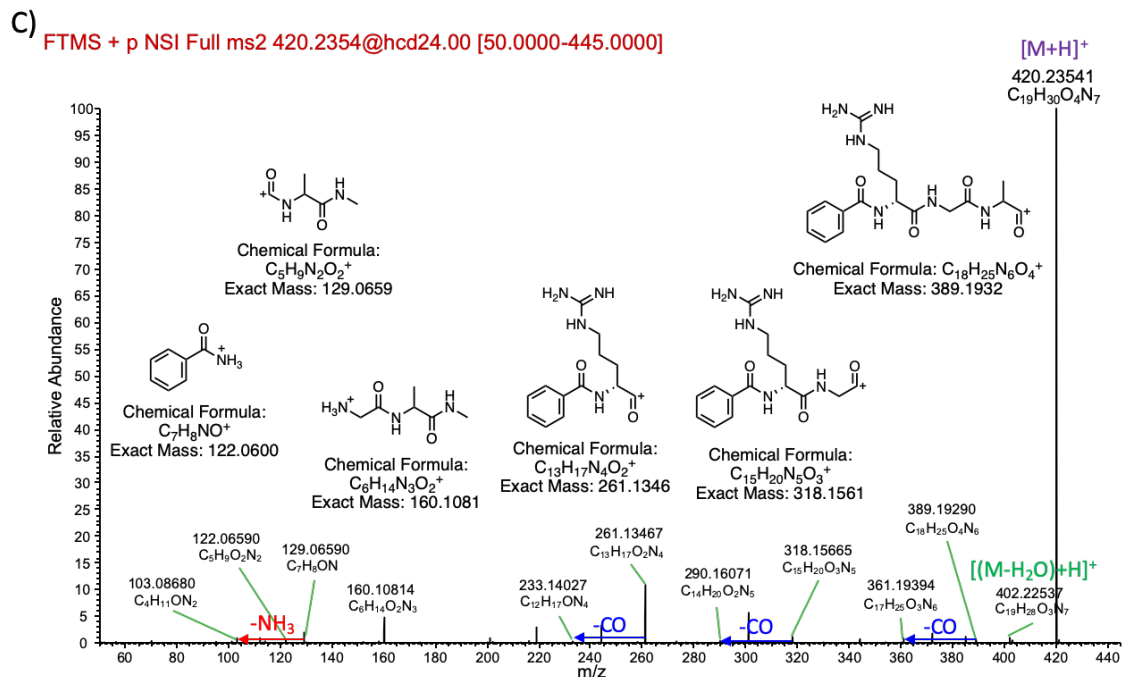

**Supplementary Figure 33. LC-HRMS analyses for reconstitution of PCP<sub>2</sub>-C<sub>3</sub>::PCP<sub>3</sub> WT using SpyCatcher and SpyTag.** Experiments utilized BA-D-Arg-Gly as the donor substrate and Ala as the acceptor substrate. A) Extracted ion chromatograms for masses corresponding to the donor tripeptide (upper) and product tetrapeptide (lower) (Orbitrap Fusion, [M+H]<sup>+</sup>). B) Accurate mass and isotopic distribution of BA-D-Arg-Gly-Ala product. C) MS<sup>2</sup> fragmentation for BA-D-Arg-Gly-Ala product.

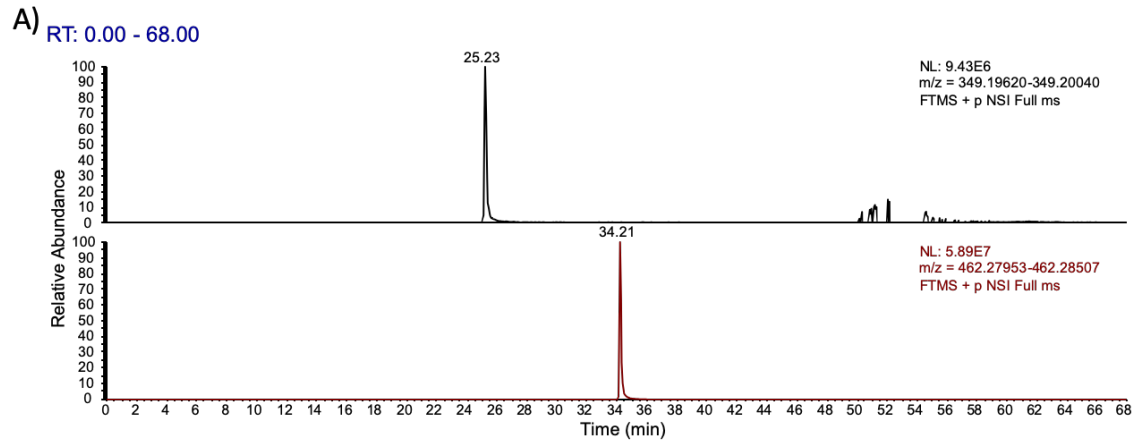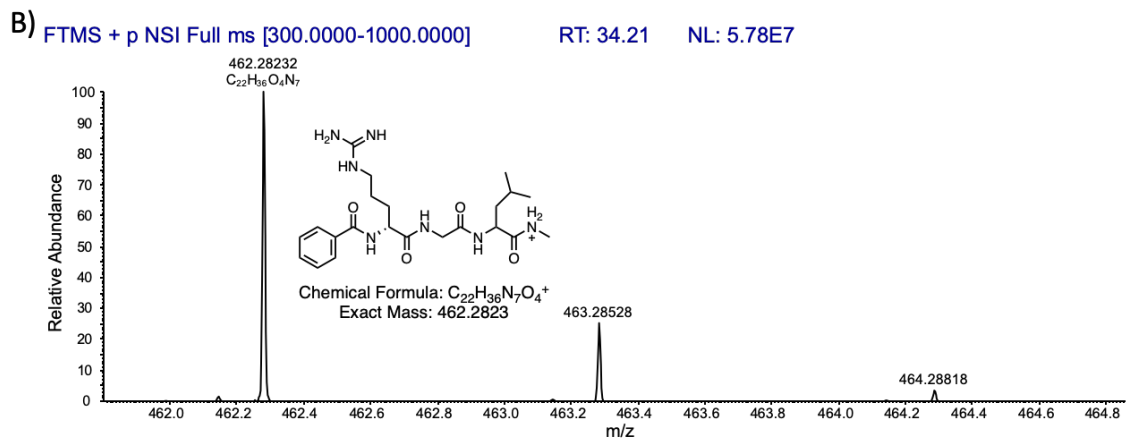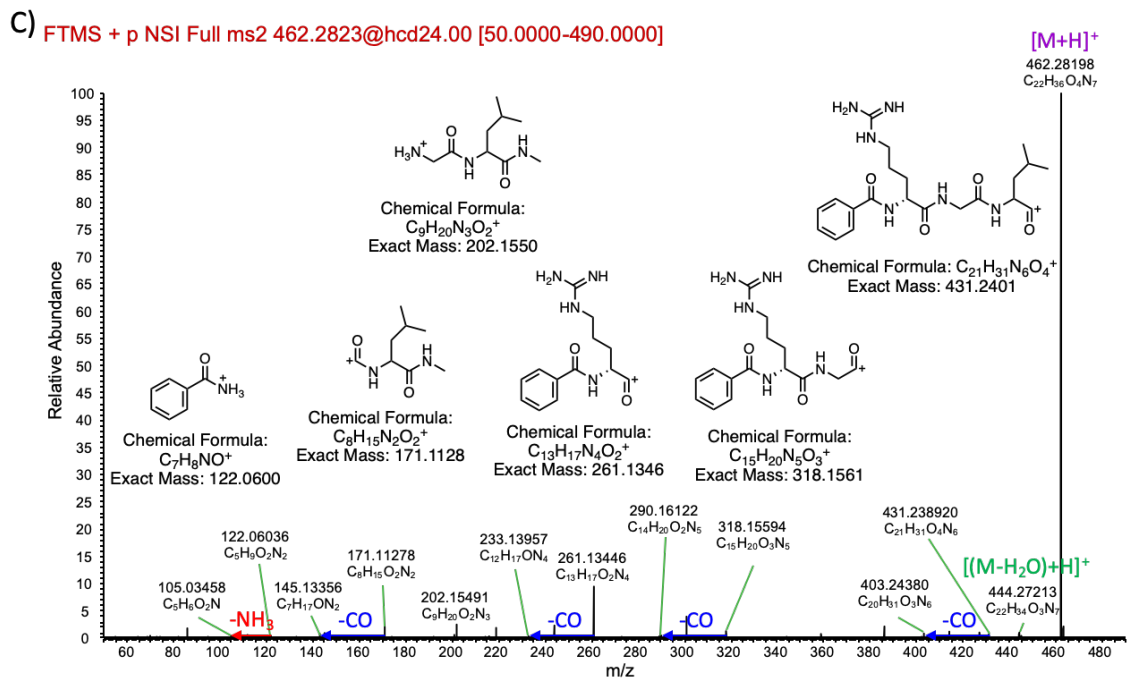

**Supplementary Figure 34. LC-HRMS analyses for reconstitution of PCP<sub>2</sub>-C<sub>3</sub>::PCP<sub>3</sub> WT using SpyCatcher and SpyTag.** Experiments utilized BA-D-Arg-Gly as the donor substrate and Leu as the acceptor substrate. A) Extracted ion chromatograms for masses corresponding to the donor tripeptide (upper) and product tetrapeptide (lower) (Orbitrap Fusion, [M+H]<sup>+</sup>). B) Accurate mass and isotopic distribution of BA-D-Arg-Gly-Leu product. C) MS<sup>2</sup> fragmentation for BA-D-Arg-Gly-Leu product.



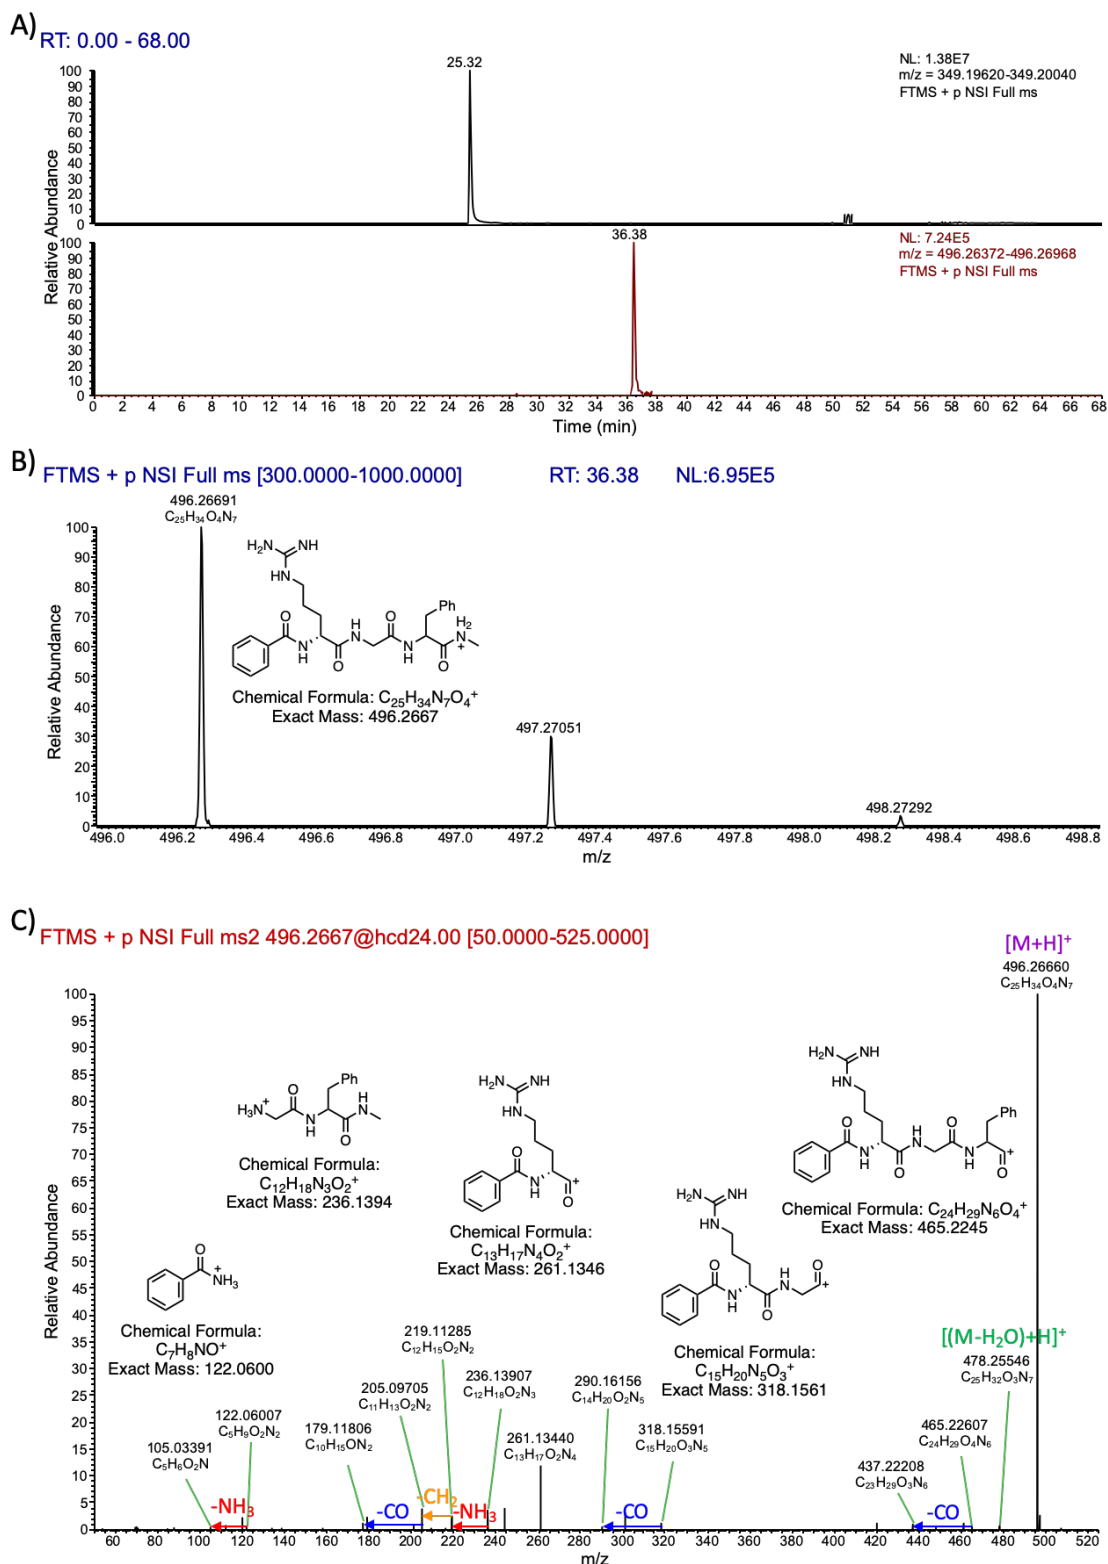

**Supplementary Figure 35. LC-HRMS analyses for reconstitution of PCP<sub>2</sub>-C<sub>3</sub>::PCP<sub>3</sub> WT using SpyCatcher and SpyTag.** Experiments utilized BA-D-Arg-Gly as the donor substrate and Phe as the acceptor substrate. A) Extracted ion chromatograms for masses corresponding to the donor tripeptide

(upper) and product tetrapeptide (lower) (Orbitrap Fusion, [M+H]<sup>+</sup>). B) Accurate mass and isotopic distribution of BA-D-Arg-Gly-Phe product. C) MS<sup>2</sup> fragmentation for BA-D-Arg-Gly-Phe product.

### Supplementary References

- 1 Holm, L. & Rosenström, P. Dali server: conservation mapping in 3D. *Nucleic Acids Res.* **38**, W545-W549, (2010).
- 2 Drake, E. J. *et al.* Structures of two distinct conformations of holo-non-ribosomal peptide synthetases. *Nature* **529**, 235-238, (2016).
- 3 Tufar, P. *et al.* Crystal Structure of a PCP/Sfp Complex Reveals the Structural Basis for Carrier Protein Posttranslational Modification. *Chem. Biol.* **21**, 552-562, (2014).
- 4 Lohman, J. R. *et al.* The crystal structure of BlmI as a model for nonribosomal peptide synthetase peptidyl carrier proteins. *Proteins Struct. Func. Bioinf.* **82**, 1210-1218, (2014).
- 5 Liu, Y., Zheng, T. & Bruner, Steven D. Structural Basis for Phosphopantetheinyl Carrier Domain Interactions in the Terminal Module of Nonribosomal Peptide Synthetases. *Chem. Biol.* **18**, 1482-1488, (2011).
- 6 Samel, S. A., Schoenafinger, G., Knappe, T. A., Marahiel, M. A. & Essen, L.-O. Structural and Functional Insights into a Peptide Bond-Forming Bidomain from a Nonribosomal Peptide Synthetase. *Structure* **15**, 781-792, (2007).
- 7 Haslinger, K., Peschke, M., Brieke, C., Maximowitsch, E. & Cryle, M. J. X-domain of peptide synthetases recruits oxygenases crucial for glycopeptide biosynthesis. *Nature* **521**, 105-109, (2015).
- 8 Reimer, J. M. *et al.* Structures of a dimodular nonribosomal peptide synthetase reveal conformational flexibility. *Science* **366**, eaaw4388, (2019).
- 9 Greule, A. *et al.* Kistamicin biosynthesis reveals the biosynthetic requirements for production of highly crosslinked glycopeptide antibiotics. *Nature Commun.* **10**, 2613, (2019).
- 10 Krissinel, E. & Henrick, K. Inference of Macromolecular Assemblies from Crystalline State. *J. Mol. Biol.* **372**, 774-797, (2007).
- 11 Frisch, M. J. T., G. W.; Schlegel, H. B.; Scuseria, G. E.; Robb, M. A.; Cheeseman, J. R.; Scalmani, G.; Barone, V.; Mennucci, B.; Petersson, G. A.; Nakatsuji, H.; Caricato, M.; Li, X.; Hratchian, H. P.; Izmaylov, A. F.; Bloino, J.; Zheng, G.; Sonnenberg, J. L.; Hada, M.; Ehara, M.; Toyota, K.; Fukuda, R.; Hasegawa, J.; Ishida, M.; Nakajima, T.; Honda, Y.; Kitao, O.; Nakai, H.; Vreven, T.; Montgomery, J. A., Jr.; Peralta, J. E.; Ogliaro, F.; Bearpark, M.; Heyd, J. J.; Brothers, E.; Kudin, K. N.; Staroverov, V. N.; Kobayashi, R.; Normand, J.; Raghavachari, K.; Rendell, A.; Burant, J. C.; Iyengar, S. S.; Tomasi, J.; Cossi, M.; Rega, N.; Millam, J. M.; Klene, M.; Knox, J. E.; Cross, J. B.; Bakken, V.; Adamo, C.; Jaramillo, J.; Gomperts, R.; Stratmann, R. E.; Yazyev, O.; Austin, A. J.; Cammi, R.; Pomelli, C.; Ochterski, J. W.; Martin, R. L.; Morokuma, K.; Zakrzewski, V. G.; Voth, G. A.; Salvador, P.; Dannenberg, J. J.; Dapprich, S.; Daniels, A. D.; Farkas, Ö.; Foresman, J. B.; Ortiz, J. V.; Cioslowski, J.; Fox, D. J. (Gaussian, Inc., Wallingford, CT, 2013).
- 12 Lee, C., Yang, W. & Parr, R. G. Development of the Colle-Salvetti correlation-energy formula into a functional of the electron density. *Phys. Rev. B* **37**, 785-789, (1988).

- 13 Becke, A. D. A new mixing of Hartree–Fock and local density-functional theories. *J. Chem. Phys.* **98**, 1372-1377, (1993).
- 14 Becke, A. D. Density-functional thermochemistry. III. The role of exact exchange. *J. Chem. Phys.* **98**, 5648-5652, (1993).
- 15 Stephens, P. J., Devlin, F. J., Chabalowski, C. F. & Frisch, M. J. Ab Initio Calculation of Vibrational Absorption and Circular Dichroism Spectra Using Density Functional Force Fields. *J. Phys. Chem.* **98**, 11623-11627, (1994).
- 16 Grimme, S., Antony, J., Ehrlich, S. & Krieg, H. A consistent and accurate ab initio parametrization of density functional dispersion correction (DFT-D) for the 94 elements H-Pu. *J. Chem. Phys.* **132**, 154104, (2010).
- 17 Marenich, A. V., Cramer, C. J. & Truhlar, D. G. Universal Solvation Model Based on Solute Electron Density and on a Continuum Model of the Solvent Defined by the Bulk Dielectric Constant and Atomic Surface Tensions. *J. Phys. Chem. B* **113**, 6378-6396, (2009).
- 18 Chovancova, E. *et al.* CAVER 3.0: A Tool for the Analysis of Transport Pathways in Dynamic Protein Structures. *PLOS Comp. Biol.* **8**, e1002708, (2012).
- 19 Uhlmann, S., Süßmuth, R. D. & Cryle, M. J. Cytochrome P450sky Interacts Directly with the Nonribosomal Peptide Synthetase to Generate Three Amino Acid Precursors in Skyllamycin Biosynthesis. *ACS Chem. Biol.* **8**, 2586-2596, (2013).
- 20 Cryle, M. J., Meinhart, A. & Schlichting, I. Structural Characterization of OxyD, a Cytochrome P450 Involved in b-Hydroxytyrosine Formation in Vancomycin Biosynthesis. *J. Biol. Chem.* **285**, 24562-24574, (2010).
